# Supplementary material for: The Gut Microbiome Dynamically Associates with Host Glucose Metabolism throughout Pregnancy: Longitudinal Findings from a Matched Case‐Control Study of Gestational Diabetes Mellitus
Source: PubMed Central journal article supplement (PMC10074094; doi:10.1002/advs.202205289), 2023-01-22
Supplement: ADVS-10-2205289-s001.pdf [file ADVS-10-2205289-s001.pdf]

## Supporting Information

### **The Gut Microbiome Dynamically Associates with Host Glucose Metabolism throughout Pregnancy: Longitudinal Findings from a Matched Case-control Study of Gestational Diabetes Mellitus**

*Zhonghan Sun, Xiong-Fei Pan, Xiao Li, Limiao Jiang, Ping Hu, Yi Wang, Yi Ye, Ping Wu, Bin Zhao, Jianguo Xu, Mengmeng Kong, Yanni Pu, Manying Zhao, Jianying Hu, Jinfeng Wang, Guo-Chong Chen, Changzheng Yuan, Yongfu Yu, Xiang Gao, Fangqing Zhao, An Pan, Yan Zheng*

Figure S1. The relative abundances of microbial of phylum among GDM cases and controls at each trimester of pregnancy.

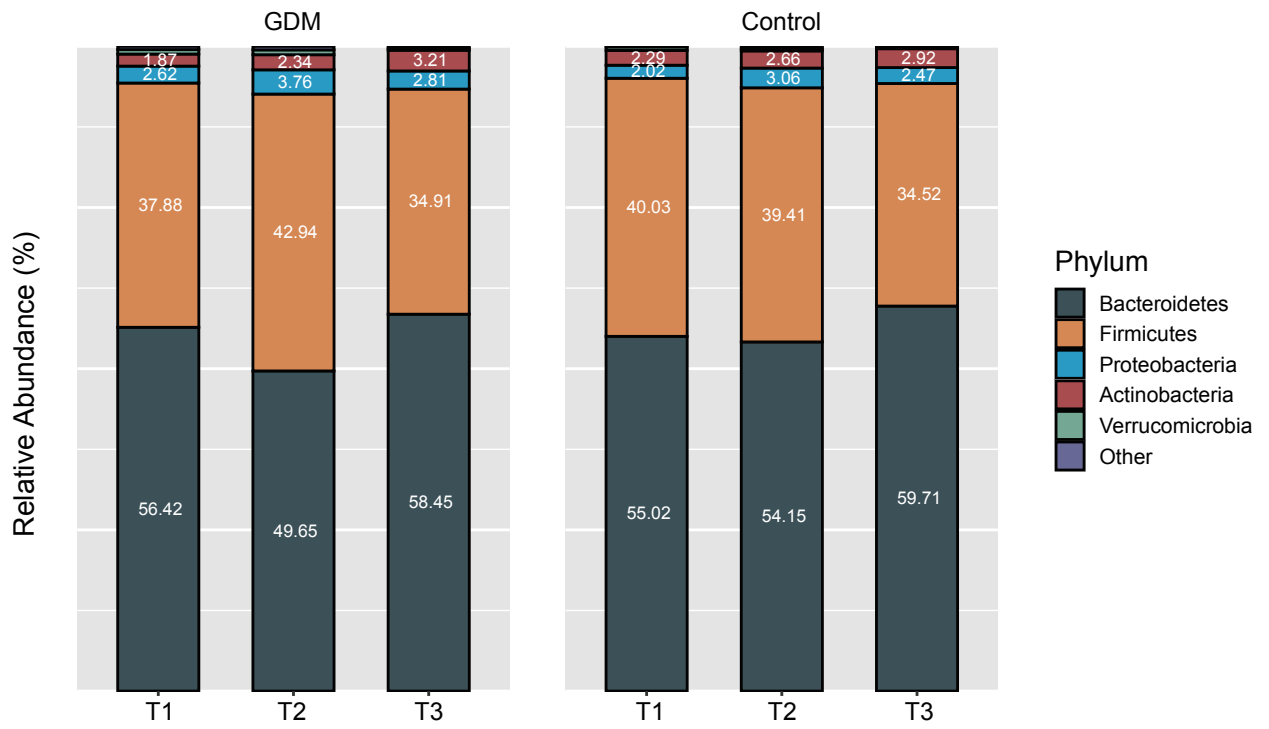

**Figure S2. The composition of gut microbiome among GDM cases and control at each trimester.** The  $\alpha$ -diversity was represented by the Shannon index (A) and the  $\beta$ -diversity distance (B) was calculated using the Bray-Curtis distance, both of which were calculated with microbial data at the species level.

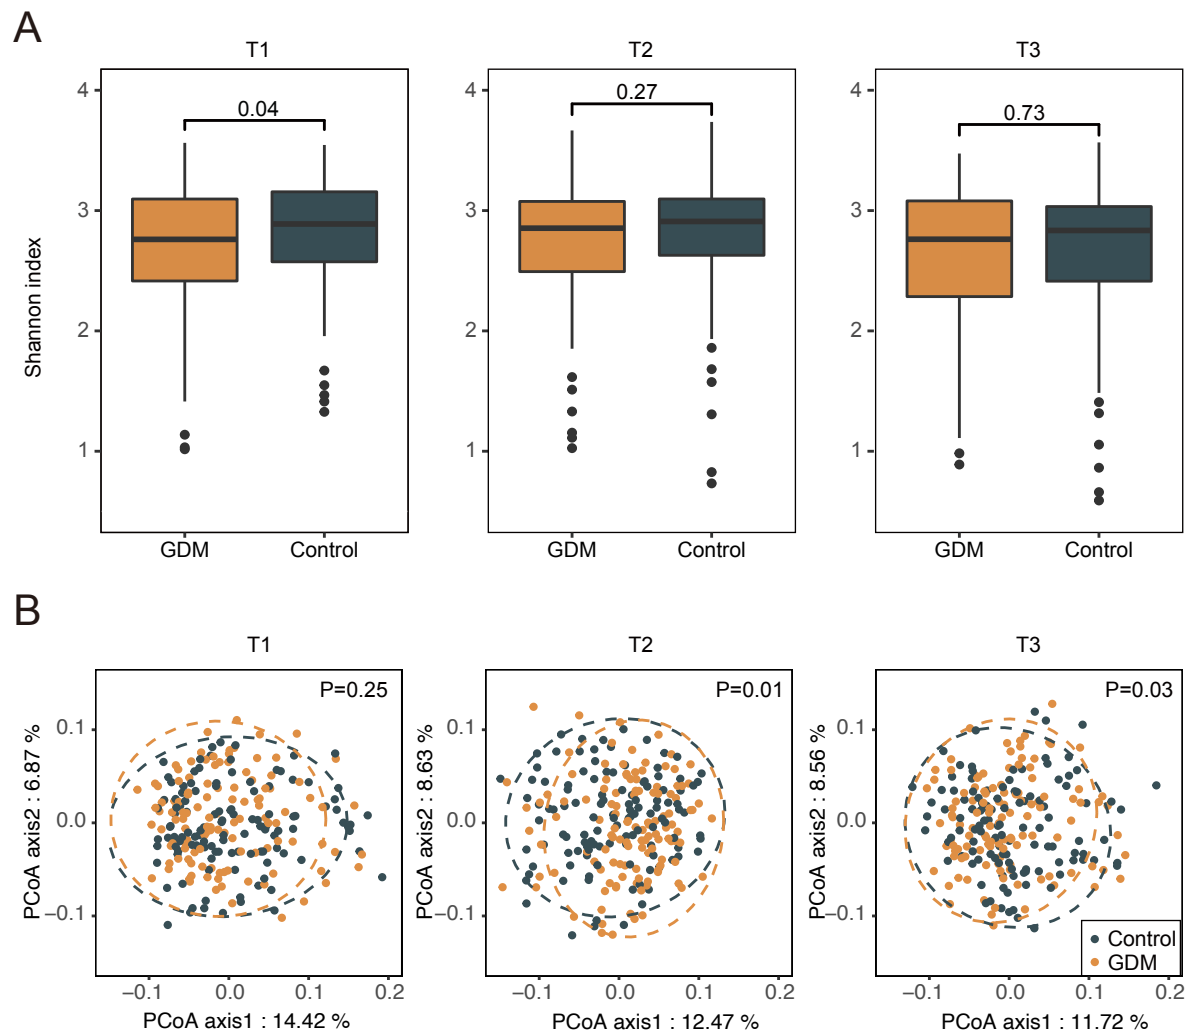

**Figure S3. The distributions of GDM-related species in GDM patients and controls during pregnancy.** (A) The microbial species differentially enriched between GDM patients and NGT controls at each trimester. Yellow bubbles represent the group in which the species had higher relative abundances. The bubble size represents the log-transformed fold change of the relative abundance between two groups (GDM vs. Control). (B) The temporal change of the relative abundances of GDM-related species in GDM cases and control during pregnancy.

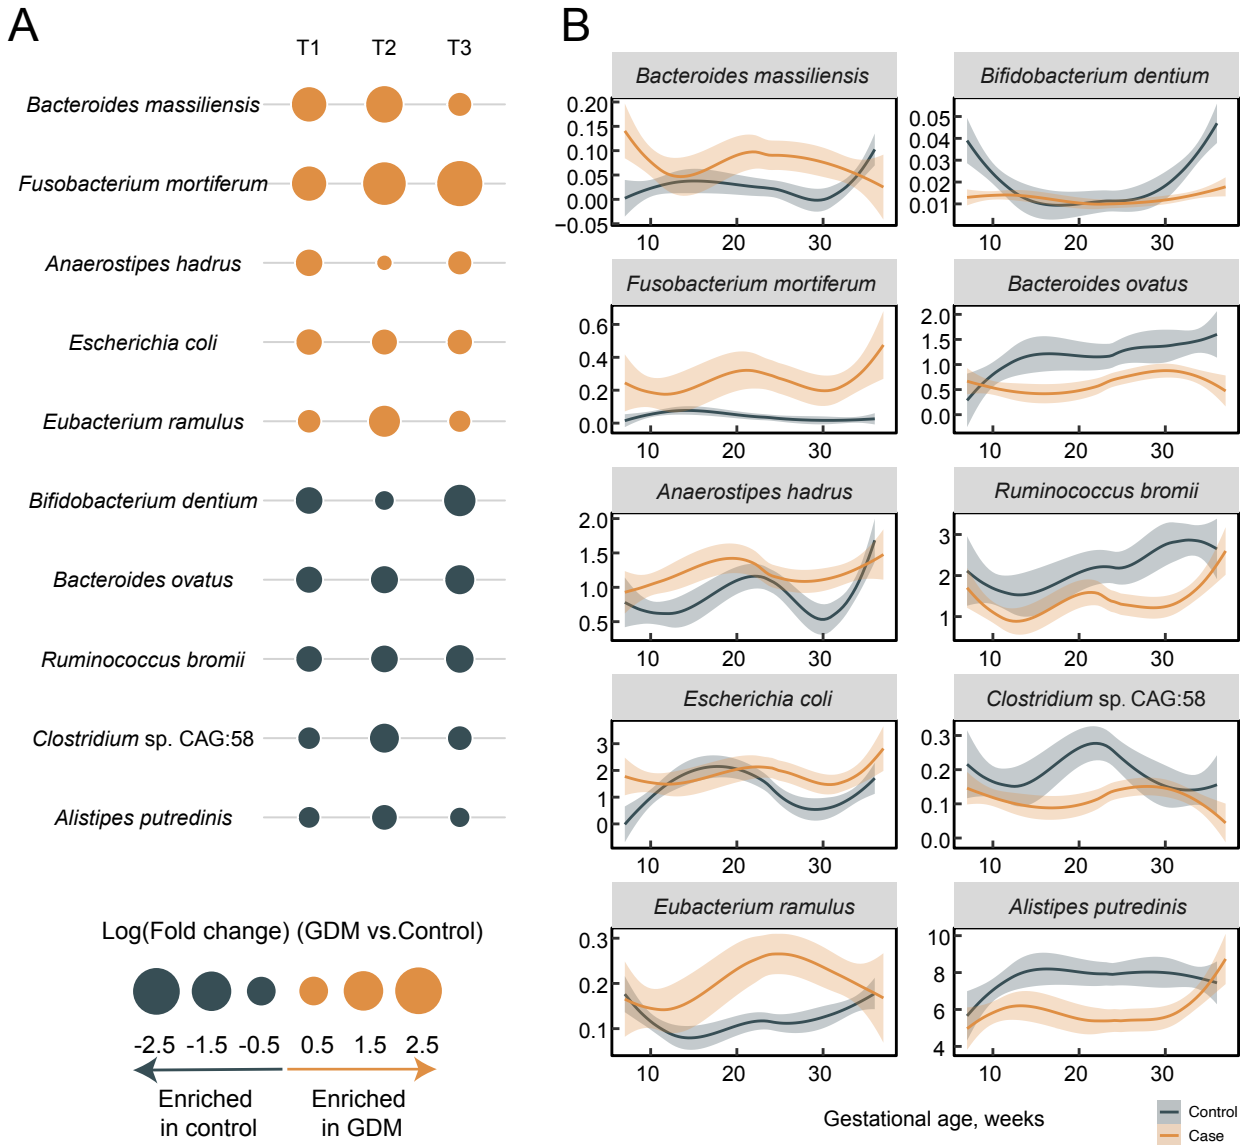



**Figure S4.** GDM-related microbial pathways associated with glucose metabolism. (A) The associations between GDM-related pathways and host glucose metabolism and BMI. Asterisks represent FDR < 0.25. (B) The microbial pathways differentially enriched between GDM patients and controls at each trimester. Yellow bubbles represent GDM-increased pathways and blue bubbles represent GDM-decreased pathways. The bubble size represents the log-transformed fold change of the relative abundance between the two groups. (C) The temporal change of the relative abundances of GDM-related species in GDM cases and control during pregnancy.

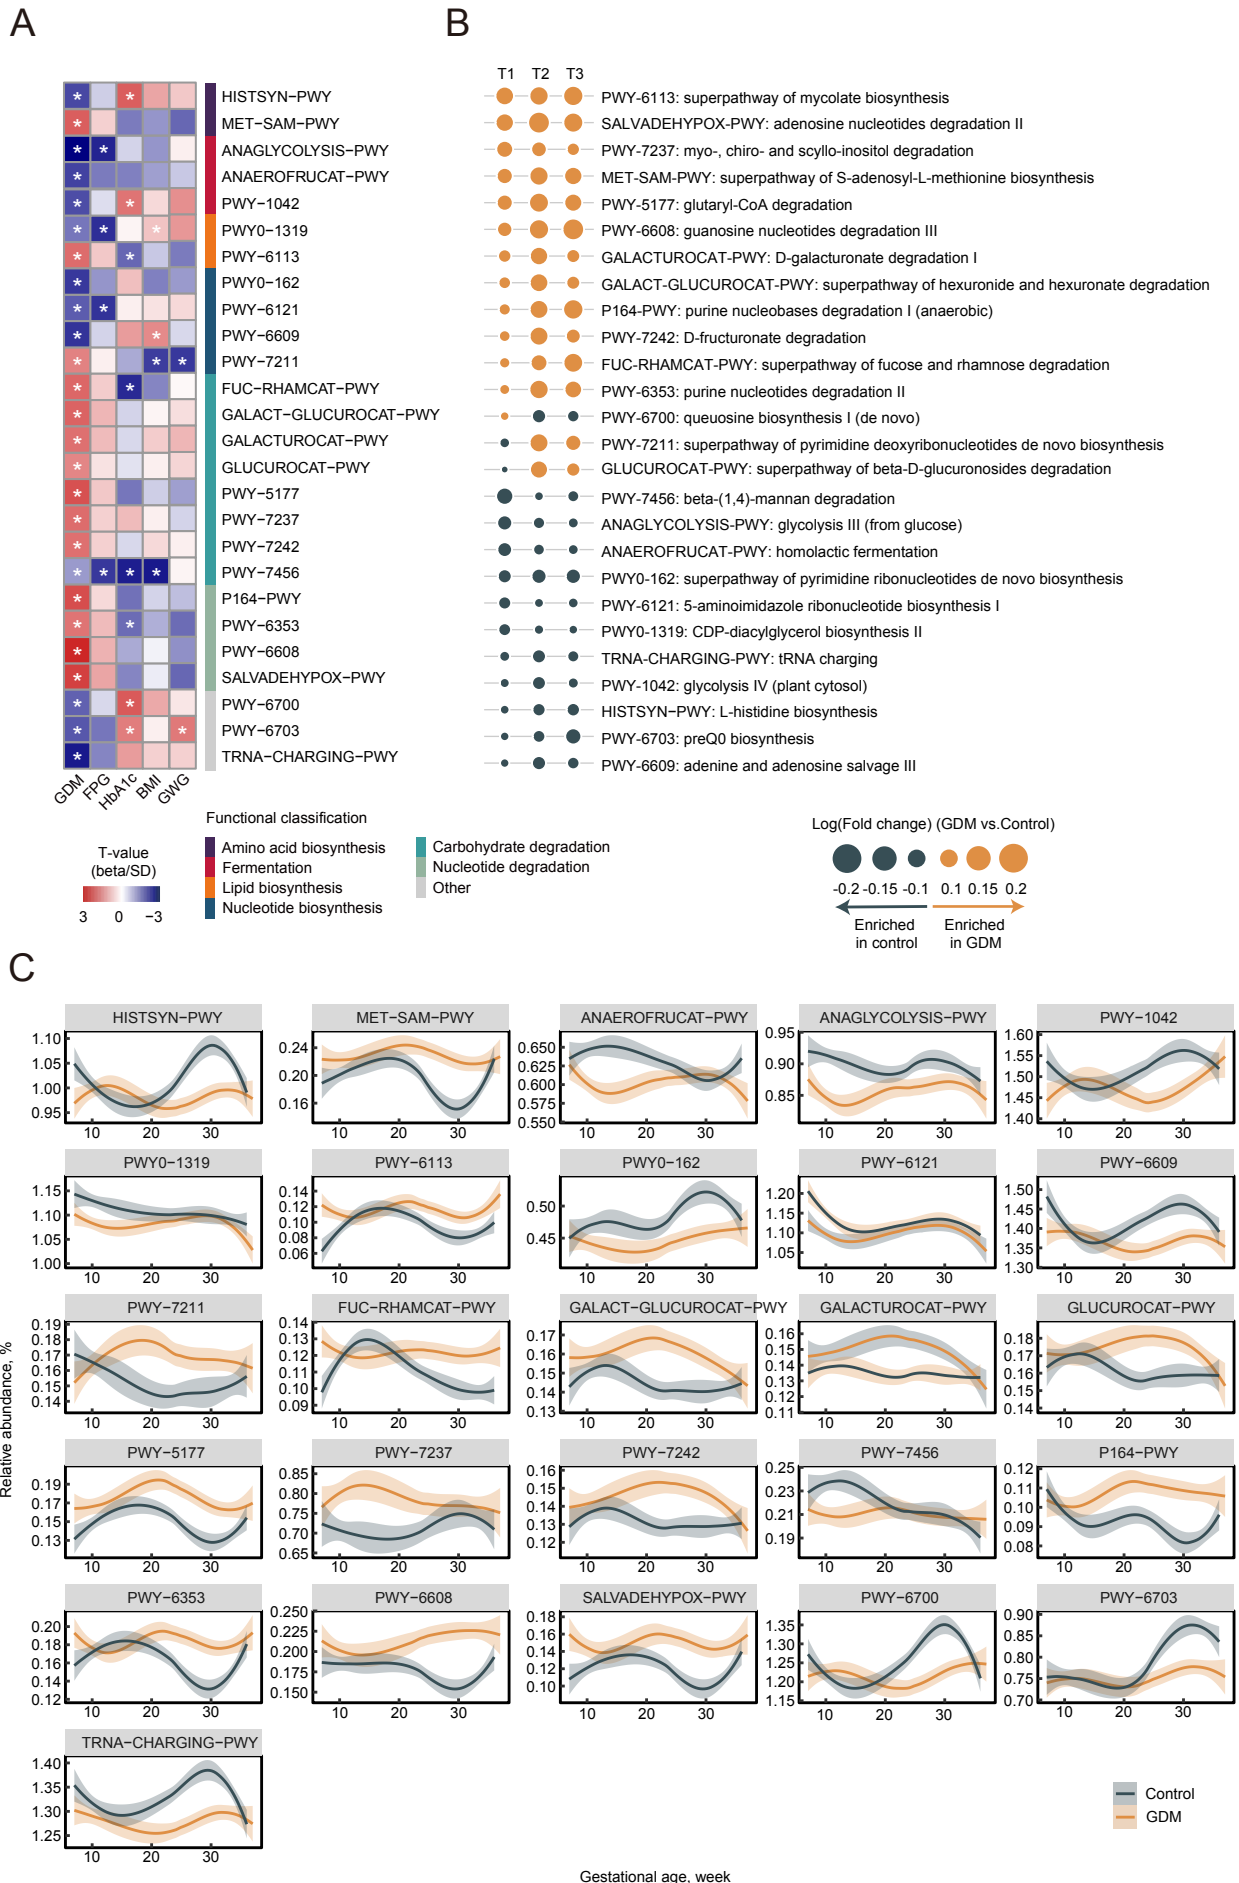

**Figure S5. Fecal levels of major SCFAs during pregnancy.** The left panels showed the SCFAs levels measured at each trimester, and the right panels showed the temporal change of SCFAs levels between the first and second trimesters.

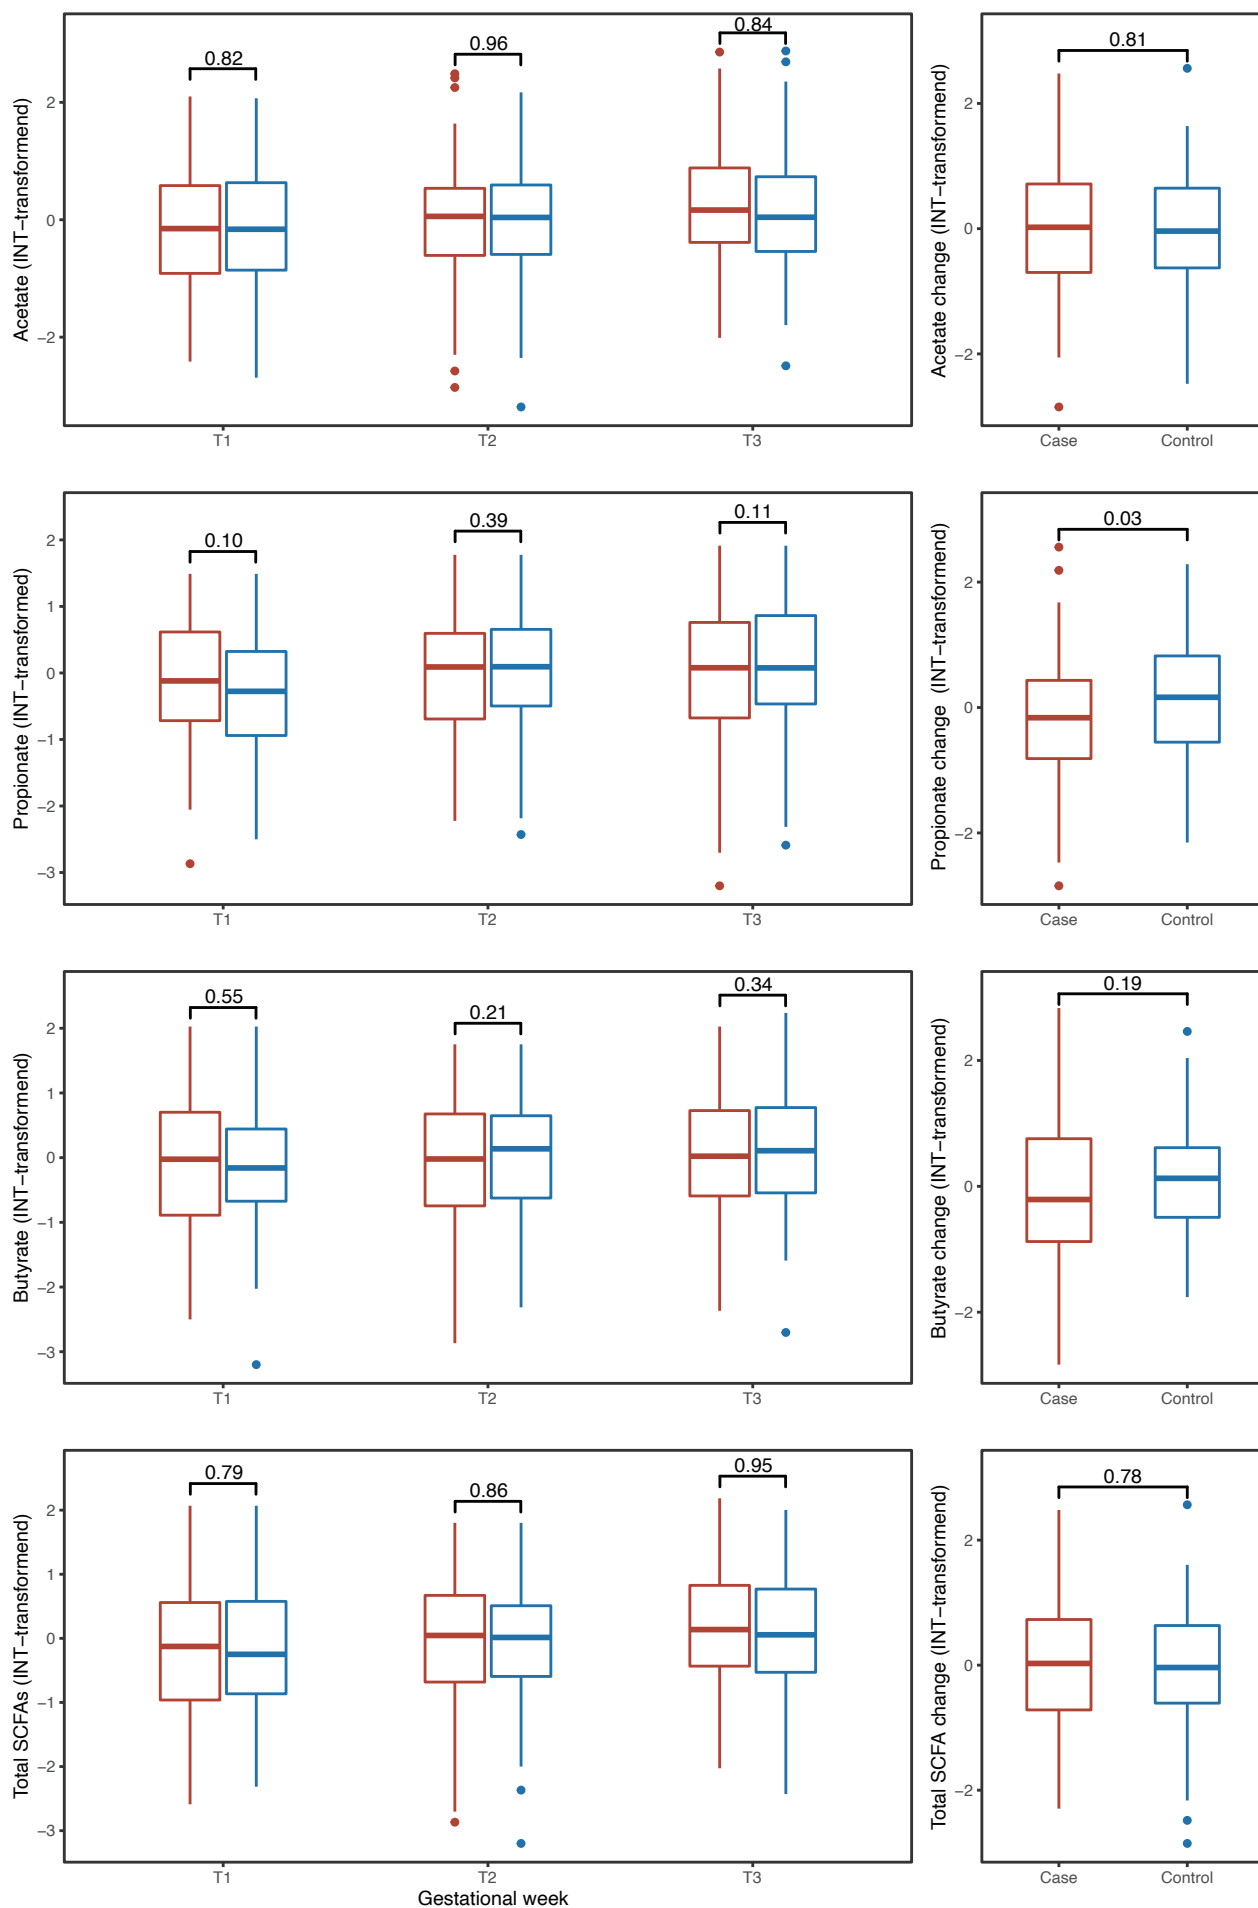

**Figure S6. The associations between fecal levels of SCFAs and glucose metabolism.**  
Asterisks represented  $P < 0.25$ .

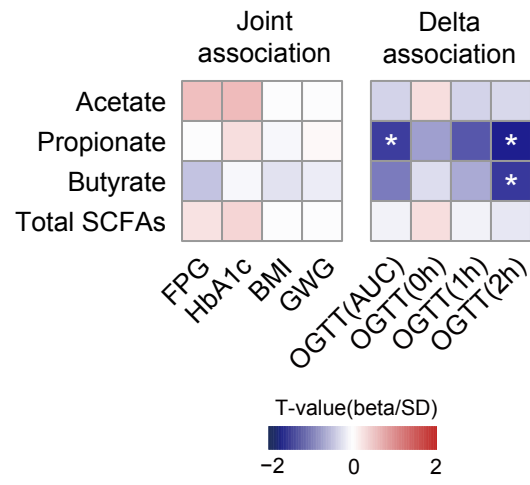

**Table S1. Basic characteristics, clinical measurements and dietary intake amounts among GDM cases and controls at baseline and during the pregnancy.**

|                                          | <b>GDM<br/>n=120</b> | <b>Non-GDM<br/>n=120</b> | <b>P-value</b>    |
|------------------------------------------|----------------------|--------------------------|-------------------|
| <b>Age, years</b>                        | 27.5 ± 4.0           | 27.3 ± 3.8               | 0.78              |
| <b>Gestational age, weeks</b>            |                      |                          |                   |
| First trimester                          | 10.2 ± 2.0           | 10.4 ± 1.8               | 0.3               |
| Second trimester                         | 23.9 ± 1.6           | 24.0 ± 1.5               | 0.69              |
| Third trimester                          | 33.6 ± 1.2           | 33.7 ± 1.1               | 0.1               |
| <b>Smoking history</b>                   |                      |                          | 1                 |
| Current/Former                           | 5 (4.2)              | 6 (4.9)                  |                   |
| Never                                    | 115 (95.8)           | 115 (95.1)               |                   |
| <b>Drinking history</b>                  |                      |                          | 0.25              |
| Current/Former                           | 22 (19.2)            | 15 (13.1)                |                   |
| Never                                    | 98 (80.8)            | 105 (86.9)               |                   |
| <b>Education</b>                         |                      |                          | 0.74              |
| Junior secondary                         | 40 (33.3)            | 38 (31.1)                |                   |
| Senior secondary                         | 62 (51.7)            | 60 (50.0)                |                   |
| Tertiary                                 | 18 (15.0)            | 22 (18.9)                |                   |
| <b>Family history of type 2 diabetes</b> | 6 (5.0)              | 7 (5.7)                  | 1                 |
| <b>Parity</b>                            |                      |                          | 1                 |
| 0                                        | 61 (50.8)            | 58 (48.3)                |                   |
| >1                                       | 59 (49.2)            | 62 (51.7)                |                   |
| <b>BMI, kg/m<sup>2</sup></b>             |                      |                          |                   |
| Prepregnancy                             | 21.6 ± 3.1           | 20.8 ± 2.4               | <b>0.039</b>      |
| First trimester                          | 22.0 ± 3.0           | 21.1 ± 2.5               | <b>0.012</b>      |
| Second trimester                         | 24.2 ± 3.1           | 23.5 ± 2.5               | <b>0.041</b>      |
| Third trimester                          | 25.7 ± 3.0           | 25.7 ± 2.4               | 0.89              |
| <b>Gestational weight gain, kg</b>       |                      |                          |                   |
| First trimester                          | 1.2 ± 2.8            | 0.7 ± 2.2                | 0.18              |
| Second trimester                         | 6.6 ± 4.0            | 6.6 ± 3.0                | 0.96              |
| Third trimester                          | 10.4 ± 4.7           | 12.2 ± 3.3               | <b>&lt; 0.001</b> |
| <b>Physical activity levels, METs</b>    |                      |                          |                   |
| First trimester                          | 116.1 ± 65.0         | 131.4 ± 66.0             | <b>0.04</b>       |
| Second trimester                         | 128.3 ± 78.3         | 128.3 ± 68.4             | 0.99              |
| Third trimester                          | 132.0 ± 64.4         | 135.5 ± 71.6             | 0.68              |
| <b>Systolic blood pressure, mmHg</b>     |                      |                          |                   |
| First trimester                          | 111.6 ± 10.2         | 108.6 ± 8.6              | <b>0.01</b>       |
| Second trimester                         | 112.4 ± 9.7          | 109.1 ± 8.8              | <b>0.005</b>      |
| Third trimester                          | 110.8 ± 9.0          | 110.3 ± 9.0              | 0.62              |
| <b>Diastolic blood pressure, mmHg</b>    |                      |                          |                   |
| First trimester                          | 74.5 ± 8.5           | 73.6 ± 7.4               | 0.24              |
| Second trimester                         | 72.4 ± 7.1           | 70.4 ± 6.7               | <b>0.02</b>       |
| Third trimester                          | 75.2 ± 8.1           | 74.3 ± 7.3               | 0.51              |
| <b>Fasting plasma glucose, mmol/L</b>    |                      |                          |                   |
| First trimester                          | 4.5 ± 0.5            | 4.3 ± 0.4                | <b>0.002</b>      |
| Second trimester                         | 4.3 ± 0.6            | 3.9 ± 0.3                | <b>&lt; 0.001</b> |

|                                   |               |               |                |
|-----------------------------------|---------------|---------------|----------------|
| Third trimester                   | 4.2 ± 0.5     | 4.3 ± 0.4     | 0.64           |
| <b>OGTT 1h glucose, mmol/L</b>    | 10.0 ± 1.7    | 6.8 ± 1.5     | < 0.001        |
| <b>OGTT 2h glucose, mmol/L</b>    | 8.7 ± 1.7     | 5.9 ± 1.0     | < 0.001        |
| <b>Hemoglobin A1c, %</b>          |               |               |                |
| First trimester                   | 5.2 ± 0.3     | 5.1 ± 0.2     | < <b>0.001</b> |
| Second trimester                  | 4.8 ± 0.3     | 4.6 ± 0.3     | < <b>0.001</b> |
| Third trimester                   | 5.1 ± 0.4     | 5.0 ± 0.3     | <b>0.014</b>   |
| <b>Refined Grain, serving/day</b> |               |               |                |
| T1                                | 3.3 ± 1.7     | 3.6 ± 1.8     | 0.13           |
| T2                                | 3.7 ± 1.7     | 3.9 ± 1.7     | 0.27           |
| T3                                | 2.3 ± 1.4     | 3.3 ± 1.5     | < <b>0.001</b> |
| <b>Vegetable, serving/day</b>     |               |               |                |
| T1                                | 3.4 ± 2.1     | 3.3 ± 2.2     | 0.94           |
| T2                                | 4.0 ± 1.9     | 3.6 ± 2.1     | 0.08           |
| T3                                | 2.6 ± 2.1     | 2.3 ± 1.9     | 0.27           |
| <b>Fruit, serving/day</b>         |               |               |                |
| T1                                | 5.2 ± 2.7     | 5.6 ± 2.7     | 0.27           |
| T2                                | 5.4 ± 2.7     | 5.3 ± 2.7     | 0.87           |
| T3                                | 2.9 ± 1.9     | 3.6 ± 2.0     | <b>0.003</b>   |
| <b>Meat, serving/day</b>          |               |               |                |
| T1                                | 0.9 ± 0.6     | 1.1 ± 0.7     | 0.17           |
| T2                                | 1.2 ± 0.6     | 1.2 ± 0.7     | 0.72           |
| T3                                | 1.4 ± 0.9     | 1.3 ± 0.6     | 0.27           |
| <b>Egg, serving/day</b>           |               |               |                |
| T1                                | 0.8 ± 0.6     | 0.8 ± 0.5     | 0.94           |
| T2                                | 0.9 ± 0.5     | 0.9 ± 0.6     | 0.94           |
| T3                                | 1.1 ± 0.4     | 1.0 ± 0.4     | <b>0.03</b>    |
| <b>Dairy product, serving/day</b> |               |               |                |
| T1                                | 192.4 ± 125.4 | 200.6 ± 111.0 | 0.95           |
| T2                                | 244.6 ± 105.8 | 211.2 ± 97.0  | <b>0.02</b>    |
| T3                                | 295.3 ± 164.3 | 264.2 ± 133.1 | <b>0.03</b>    |

Data were shown as Mean ± SD for continuous variables or N (%) for categorical variables. The group comparisons were conducted using Student's t-test or Wilcoxon ranked sum test for continuous variables and  $\chi^2$  test or Fisher's exact test for categorical variables. Each serving for refined grain, fruit, vegetable and meat were defined as 50 gram, for egg as one count, and for dairy product as 50 milliliter.

**Table S2. The relative abundance and prevalence of microbial species included in the current analysis.**

| Species                                | T1      |         |            |          |          | T2      |         |            |          |          | T3      |         |            |          |          |
|----------------------------------------|---------|---------|------------|----------|----------|---------|---------|------------|----------|----------|---------|---------|------------|----------|----------|
|                                        | Mean    | Mean    | Prevalence | Wilcoxon | Wilcoxon | Mean    | Mean    | Prevalence | Wilcoxon | Wilcoxon | Mean    | Mean    | Prevalence | Wilcoxon | Wilcoxon |
|                                        | case    | control |            | P        | FDR      | case    | control |            | P        | FDR      | case    | control |            | P        | FDR      |
| <i>Ruminococcus bicirculans</i>        | 4.1E-03 | 4.8E-03 | 0.63       | 0.00     | 0.09     | 3.4E-03 | 5.2E-03 | 0.61       | 0.17     | 0.36     | 6.4E-03 | 5.5E-03 | 0.60       | 0.81     | 0.49     |
| <i>Intestinibacter bartlettii</i>      | 2.3E-04 | 2.2E-04 | 0.28       | 0.00     | 0.17     | 3.8E-04 | 2.9E-04 | 0.36       | 0.73     | 0.49     | 1.3E-04 | 2.6E-04 | 0.27       | 0.18     | 0.37     |
| <i>Methanobrevibacter smithii</i>      | 7.6E-04 | 3.4E-05 | 0.11       | 0.00     | 0.21     | 3.9E-03 | 9.6E-04 | 0.10       | 0.10     | 0.35     | 4.2E-04 | 5.6E-04 | 0.11       | 0.64     | 0.48     |
| <i>Ruminococcus bromii</i>             | 1.1E-02 | 1.6E-02 | 0.73       | 0.00     | 0.24     | 1.4E-02 | 2.3E-02 | 0.81       | 0.01     | 0.10     | 1.7E-02 | 2.9E-02 | 0.80       | 0.01     | 0.15     |
| <i>Adlercreutzia equolifaciens</i>     | 1.2E-03 | 1.1E-03 | 0.71       | 0.01     | 0.24     | 1.2E-03 | 1.4E-03 | 0.67       | 0.90     | 0.49     | 7.8E-04 | 7.7E-04 | 0.62       | 0.46     | 0.43     |
| <i>Muribaculum intestinale</i>         | 1.3E-04 | 1.1E-04 | 0.31       | 0.01     | 0.24     | 9.4E-05 | 9.6E-05 | 0.28       | 0.20     | 0.36     | 1.1E-04 | 1.2E-04 | 0.30       | 0.40     | 0.42     |
| <i>Gordonia jacobaea</i>               | 1.1E-04 | 7.9E-05 | 0.25       | 0.01     | 0.24     | 6.4E-05 | 5.7E-05 | 0.19       | 0.09     | 0.35     | 8.3E-05 | 6.2E-05 | 0.21       | 0.29     | 0.40     |
| <i>Bacteroides plebeius</i>            | 2.8E-02 | 4.0E-02 | 0.75       | 0.01     | 0.24     | 2.1E-02 | 3.3E-02 | 0.73       | 0.49     | 0.49     | 2.3E-02 | 3.8E-02 | 0.72       | 0.19     | 0.37     |
| <i>Bifidobacterium longum</i>          | 7.3E-04 | 2.2E-03 | 0.38       | 0.01     | 0.24     | 1.5E-03 | 2.4E-03 | 0.38       | 0.04     | 0.25     | 9.2E-04 | 1.7E-03 | 0.39       | 0.19     | 0.37     |
| <i>Firmicutes bacterium CAG 95</i>     | 1.5E-03 | 1.3E-03 | 0.36       | 0.01     | 0.24     | 4.2E-04 | 1.0E-03 | 0.31       | 0.09     | 0.35     | 1.4E-03 | 9.7E-04 | 0.27       | 0.91     | 0.50     |
| <i>Eubacterium sp CAG 251</i>          | 4.1E-03 | 9.3E-03 | 0.34       | 0.01     | 0.24     | 6.5E-03 | 6.1E-03 | 0.33       | 0.72     | 0.49     | 5.1E-03 | 8.3E-03 | 0.36       | 0.13     | 0.37     |
| <i>Asaccharobacter celatus</i>         | 4.3E-04 | 5.8E-04 | 0.58       | 0.01     | 0.24     | 5.0E-04 | 5.8E-04 | 0.57       | 0.54     | 0.49     | 2.7E-04 | 2.8E-04 | 0.43       | 0.25     | 0.38     |
| <i>Bacteroides salyersiae</i>          | 2.5E-04 | 2.7E-04 | 0.16       | 0.01     | 0.24     | 6.8E-04 | 1.2E-03 | 0.18       | 0.61     | 0.49     | 5.8E-04 | 2.8E-04 | 0.18       | 0.19     | 0.37     |
| <i>Alistipes putredinis</i>            | 5.9E-02 | 7.2E-02 | 0.98       | 0.02     | 0.24     | 5.4E-02 | 7.9E-02 | 0.98       | 0.00     | 0.08     | 6.5E-02 | 7.7E-02 | 0.98       | 0.11     | 0.37     |
| <i>Pseudonocardia ammonioxydans</i>    | 3.8E-04 | 2.0E-04 | 0.42       | 0.02     | 0.24     | 1.8E-04 | 1.5E-04 | 0.30       | 0.57     | 0.49     | 1.1E-04 | 1.3E-04 | 0.28       | 0.08     | 0.34     |
| <i>Bacteroides sp 43 108</i>           | 6.5E-05 | 5.0E-05 | 0.16       | 0.02     | 0.24     | 5.1E-05 | 5.5E-05 | 0.09       | 0.94     | 0.49     | 6.2E-05 | 6.9E-05 | 0.16       | 0.47     | 0.43     |
| <i>Barnesiella sp An22</i>             | 9.9E-05 | 6.5E-05 | 0.26       | 0.02     | 0.24     | 7.6E-05 | 6.3E-05 | 0.23       | 0.29     | 0.41     | 4.9E-05 | 7.3E-05 | 0.20       | 0.05     | 0.34     |
| <i>Bacteroides ovatus</i>              | 5.7E-03 | 9.0E-03 | 0.76       | 0.02     | 0.24     | 7.0E-03 | 1.2E-02 | 0.73       | 0.00     | 0.02     | 7.4E-03 | 1.4E-02 | 0.76       | 0.06     | 0.34     |
| <i>Alistipes indistinctus</i>          | 9.8E-04 | 1.5E-03 | 0.43       | 0.02     | 0.26     | 1.5E-03 | 1.7E-03 | 0.44       | 0.01     | 0.10     | 1.9E-03 | 1.2E-03 | 0.43       | 0.17     | 0.37     |
| <i>Turicibacter sanguinis</i>          | 6.3E-05 | 1.4E-04 | 0.15       | 0.02     | 0.26     | 2.1E-04 | 1.4E-04 | 0.21       | 0.20     | 0.36     | 1.9E-04 | 2.6E-04 | 0.20       | 0.72     | 0.48     |
| <i>Porphyromonas sp HMSC065F10</i>     | 2.5E-04 | 1.4E-04 | 0.44       | 0.02     | 0.26     | 9.8E-05 | 2.2E-04 | 0.30       | 0.71     | 0.49     | 1.1E-04 | 1.1E-04 | 0.26       | 0.07     | 0.34     |
| <i>Blautia obeum</i>                   | 1.7E-03 | 1.9E-03 | 0.84       | 0.03     | 0.31     | 2.2E-03 | 2.4E-03 | 0.85       | 0.14     | 0.35     | 1.4E-03 | 1.6E-03 | 0.81       | 0.24     | 0.37     |
| <i>Prevotella stercorea</i>            | 3.0E-02 | 1.4E-02 | 0.51       | 0.03     | 0.31     | 2.1E-02 | 1.3E-02 | 0.61       | 0.69     | 0.49     | 2.5E-02 | 1.6E-02 | 0.55       | 0.19     | 0.37     |
| <i>Phascolarctobacterium faecium</i>   | 7.3E-03 | 9.8E-03 | 0.82       | 0.03     | 0.31     | 6.8E-03 | 9.3E-03 | 0.84       | 0.65     | 0.49     | 7.1E-03 | 6.9E-03 | 0.82       | 0.57     | 0.45     |
| <i>Bacteroidales bacterium KA00251</i> | 7.0E-05 | 1.1E-04 | 0.32       | 0.03     | 0.31     | 7.9E-05 | 9.6E-05 | 0.27       | 0.07     | 0.33     | 8.3E-05 | 1.0E-04 | 0.35       | 0.20     | 0.37     |
| <i>Dialister sp CAG 357</i>            | 6.1E-03 | 1.6E-02 | 0.24       | 0.03     | 0.31     | 1.1E-02 | 1.4E-02 | 0.32       | 0.37     | 0.46     | 6.9E-03 | 1.8E-02 | 0.40       | 0.52     | 0.45     |
| <i>Firmicutes bacterium CAG 83</i>     | 1.4E-03 | 2.3E-03 | 0.67       | 0.03     | 0.32     | 2.2E-03 | 2.4E-03 | 0.73       | 0.02     | 0.20     | 1.5E-03 | 1.7E-03 | 0.69       | 0.35     | 0.41     |
| <i>Prevotella sp AM42 24</i>           | 1.2E-03 | 1.3E-04 | 0.54       | 0.04     | 0.32     | 7.8E-04 | 1.1E-04 | 0.50       | 0.19     | 0.36     | 1.2E-03 | 1.5E-04 | 0.52       | 0.78     | 0.49     |
| <i>Methanosphaera cuniculi</i>         | 6.8E-05 | 4.0E-05 | 0.18       | 0.04     | 0.32     | 3.6E-05 | 4.9E-05 | 0.14       | 0.22     | 0.38     | 3.9E-05 | 8.6E-05 | 0.17       | 0.43     | 0.42     |

**Table S2. The relative abundance and prevalence of microbial species included in the current analysis.**

| Species                                  | T1      |         |            |          |          | T2      |         |            |          |          | T3      |         |            |          |          |
|------------------------------------------|---------|---------|------------|----------|----------|---------|---------|------------|----------|----------|---------|---------|------------|----------|----------|
|                                          | Mean    | Mean    | Prevalence | Wilcoxon | Wilcoxon | Mean    | Mean    | Prevalence | Wilcoxon | Wilcoxon | Mean    | Mean    | Prevalence | Wilcoxon | Wilcoxon |
|                                          | case    | control |            | P        | FDR      | case    | control |            | P        | FDR      | case    | control |            | P        | FDR      |
| <i>Alistipes shahii</i>                  | 2.5E-03 | 4.4E-03 | 0.74       | 0.04     | 0.32     | 3.5E-03 | 4.7E-03 | 0.74       | 0.06     | 0.31     | 3.9E-03 | 5.2E-03 | 0.77       | 0.15     | 0.37     |
| <i>Actinomyces massiliensis</i>          | 5.8E-05 | 4.3E-05 | 0.18       | 0.04     | 0.33     | 4.0E-05 | 6.1E-05 | 0.16       | 0.84     | 0.49     | 5.5E-05 | 8.5E-05 | 0.23       | 0.24     | 0.37     |
| <i>Escherichia coli</i>                  | 1.5E-02 | 9.8E-03 | 0.93       | 0.04     | 0.33     | 2.1E-02 | 1.4E-02 | 0.91       | 0.03     | 0.20     | 1.6E-02 | 1.1E-02 | 0.82       | 0.61     | 0.47     |
| <i>Corynebacterium pyruviciproducens</i> | 7.0E-05 | 1.2E-04 | 0.23       | 0.04     | 0.33     | 8.1E-05 | 1.2E-04 | 0.23       | 0.84     | 0.49     | 1.0E-04 | 1.3E-04 | 0.25       | 0.83     | 0.49     |
| <i>Actinomyces sp oral taxon 414</i>     | 7.5E-05 | 5.1E-05 | 0.17       | 0.05     | 0.33     | 7.2E-05 | 4.2E-05 | 0.17       | 0.06     | 0.31     | 7.5E-05 | 8.7E-05 | 0.17       | 0.58     | 0.46     |
| <i>Fusobacterium mortiferum</i>          | 1.7E-03 | 5.5E-04 | 0.11       | 0.05     | 0.33     | 2.9E-03 | 3.4E-04 | 0.10       | 0.36     | 0.46     | 2.7E-03 | 2.1E-04 | 0.13       | 0.03     | 0.33     |
| <i>Corynebacterium pseudogenitalium</i>  | 5.7E-05 | 7.0E-05 | 0.19       | 0.05     | 0.33     | 5.0E-05 | 5.7E-05 | 0.16       | 0.80     | 0.49     | 5.4E-05 | 8.2E-05 | 0.21       | 0.30     | 0.41     |
| <i>Firmicutes bacterium CAG 110</i>      | 2.6E-04 | 6.8E-04 | 0.26       | 0.05     | 0.33     | 4.1E-04 | 7.3E-04 | 0.24       | 0.11     | 0.35     | 3.0E-04 | 3.3E-04 | 0.20       | 0.29     | 0.40     |
| <i>Fusicatenibacter saccharivorans</i>   | 5.0E-03 | 6.9E-03 | 0.95       | 0.05     | 0.33     | 6.7E-03 | 6.4E-03 | 0.98       | 0.85     | 0.49     | 5.9E-03 | 4.6E-03 | 0.95       | 0.92     | 0.50     |
| <i>Prevotella disiens</i>                | 1.3E-04 | 8.2E-05 | 0.39       | 0.05     | 0.34     | 1.1E-04 | 1.3E-04 | 0.37       | 0.15     | 0.35     | 1.8E-04 | 1.3E-04 | 0.48       | 0.15     | 0.37     |
| <i>Prevotella corporis</i>               | 1.1E-04 | 9.6E-05 | 0.38       | 0.05     | 0.34     | 1.0E-04 | 1.2E-04 | 0.36       | 0.85     | 0.49     | 9.4E-05 | 9.2E-05 | 0.33       | 0.55     | 0.45     |
| <i>Streptococcus infantis</i>            | 7.4E-05 | 3.9E-05 | 0.12       | 0.06     | 0.34     | 7.3E-05 | 6.1E-05 | 0.13       | 0.67     | 0.49     | 8.7E-05 | 2.9E-05 | 0.12       | 0.35     | 0.41     |
| <i>Proteobacteria bacterium CAG 139</i>  | 3.4E-03 | 3.1E-03 | 0.54       | 0.06     | 0.34     | 4.4E-03 | 3.8E-03 | 0.54       | 0.08     | 0.35     | 3.4E-03 | 4.6E-03 | 0.57       | 0.49     | 0.44     |
| <i>Veillonella dispar</i>                | 4.4E-04 | 3.1E-04 | 0.33       | 0.06     | 0.34     | 3.9E-04 | 6.8E-04 | 0.30       | 0.36     | 0.46     | 7.2E-04 | 3.6E-04 | 0.27       | 0.67     | 0.48     |
| <i>Tropheryma whipplei</i>               | 2.7E-04 | 2.3E-04 | 0.39       | 0.06     | 0.34     | 3.2E-04 | 1.7E-04 | 0.32       | 0.00     | 0.08     | 1.4E-04 | 1.7E-04 | 0.33       | 0.07     | 0.34     |
| <i>Pseudomonas antarctica</i>            | 6.3E-04 | 7.2E-04 | 0.35       | 0.06     | 0.34     | 6.8E-04 | 4.7E-04 | 0.48       | 0.15     | 0.35     | 5.6E-04 | 6.2E-04 | 0.40       | 0.85     | 0.50     |
| <i>Prevotella colorans</i>               | 2.9E-04 | 1.9E-04 | 0.67       | 0.06     | 0.34     | 2.2E-04 | 1.8E-04 | 0.63       | 0.51     | 0.49     | 1.9E-04 | 3.0E-04 | 0.66       | 0.02     | 0.33     |
| <i>Corynebacterium singulare</i>         | 1.2E-04 | 8.9E-05 | 0.37       | 0.06     | 0.34     | 8.6E-05 | 1.1E-04 | 0.33       | 0.69     | 0.49     | 1.0E-04 | 1.2E-04 | 0.35       | 0.65     | 0.48     |
| <i>Bacteroides stercoris</i>             | 1.9E-02 | 2.8E-02 | 0.94       | 0.07     | 0.36     | 2.2E-02 | 2.9E-02 | 0.96       | 0.24     | 0.38     | 2.4E-02 | 4.1E-02 | 0.93       | 0.36     | 0.41     |
| <i>Eubacterium eligens</i>               | 4.4E-02 | 5.0E-02 | 0.96       | 0.07     | 0.36     | 3.7E-02 | 4.9E-02 | 0.98       | 0.42     | 0.47     | 4.1E-02 | 6.2E-02 | 0.97       | 0.05     | 0.34     |
| <i>Gardnerella vaginalis</i>             | 2.1E-04 | 2.9E-04 | 0.43       | 0.14     | 0.37     | 1.7E-04 | 1.2E-04 | 0.38       | 0.61     | 0.49     | 2.0E-04 | 2.3E-04 | 0.41       | 0.94     | 0.50     |
| <i>Bacteroides eggerthii</i>             | 3.6E-03 | 8.6E-03 | 0.32       | 0.15     | 0.38     | 2.1E-03 | 1.3E-02 | 0.36       | 0.10     | 0.35     | 7.1E-03 | 1.0E-02 | 0.37       | 0.65     | 0.48     |
| <i>Haemophilus sp HMSC71H05</i>          | 4.5E-04 | 1.1E-04 | 0.24       | 0.15     | 0.38     | 2.1E-04 | 1.2E-04 | 0.21       | 0.47     | 0.49     | 1.9E-04 | 3.9E-04 | 0.21       | 0.09     | 0.34     |
| <i>Clostridium sp CAG 58</i>             | 1.2E-03 | 1.5E-03 | 0.42       | 0.16     | 0.39     | 1.3E-03 | 2.6E-03 | 0.44       | 0.00     | 0.01     | 1.0E-03 | 1.4E-03 | 0.38       | 0.26     | 0.38     |
| <i>Holdemania filiformis</i>             | 1.2E-04 | 3.0E-04 | 0.28       | 0.17     | 0.40     | 2.2E-04 | 1.6E-04 | 0.26       | 0.80     | 0.49     | 2.1E-04 | 1.2E-04 | 0.23       | 0.13     | 0.37     |
| <i>Porphyromonas gingivalis</i>          | 9.6E-05 | 1.2E-04 | 0.29       | 0.17     | 0.40     | 1.0E-04 | 9.3E-05 | 0.28       | 0.68     | 0.49     | 9.9E-05 | 1.0E-04 | 0.33       | 0.47     | 0.43     |
| <i>Bacteroides xylanisolvens</i>         | 6.1E-03 | 1.1E-03 | 0.38       | 0.18     | 0.41     | 2.5E-03 | 1.1E-03 | 0.42       | 0.95     | 0.49     | 1.8E-03 | 1.3E-03 | 0.38       | 0.36     | 0.41     |
| <i>Cutibacterium granulosum</i>          | 1.7E-04 | 1.3E-04 | 0.56       | 0.18     | 0.41     | 1.3E-04 | 1.4E-04 | 0.46       | 0.24     | 0.38     | 1.3E-04 | 1.1E-04 | 0.46       | 0.47     | 0.43     |
| <i>Actinomyces sp HMSC035G02</i>         | 5.8E-05 | 3.9E-05 | 0.13       | 0.19     | 0.41     | 4.6E-05 | 3.4E-05 | 0.08       | 0.71     | 0.49     | 3.3E-05 | 4.5E-05 | 0.11       | 0.53     | 0.45     |

**Table S2. The relative abundance and prevalence of microbial species included in the current analysis.**

| Species                             | T1      |         |            |          |          | T2      |         |            |          |          | T3      |         |            |          |          |
|-------------------------------------|---------|---------|------------|----------|----------|---------|---------|------------|----------|----------|---------|---------|------------|----------|----------|
|                                     | Mean    | Mean    | Prevalence | Wilcoxon | Wilcoxon | Mean    | Mean    | Prevalence | Wilcoxon | Wilcoxon | Mean    | Mean    | Prevalence | Wilcoxon | Wilcoxon |
|                                     | case    | control |            | P        | FDR      | case    | control |            | P        | FDR      | case    | control |            | P        | FDR      |
| <i>Clavibacter michiganensis</i>    | 5.4E-05 | 4.0E-05 | 0.11       | 0.20     | 0.44     | 3.6E-05 | 3.7E-05 | 0.09       | 0.25     | 0.38     | 4.0E-05 | 5.7E-05 | 0.12       | 0.21     | 0.37     |
| <i>Haemophilus parainfluenzae</i>   | 1.9E-03 | 8.4E-04 | 0.62       | 0.21     | 0.45     | 1.7E-03 | 7.0E-04 | 0.50       | 0.73     | 0.49     | 9.4E-04 | 9.2E-04 | 0.48       | 0.98     | 0.50     |
| <i>Prevotella pallens</i>           | 9.9E-05 | 7.9E-05 | 0.26       | 0.22     | 0.45     | 7.9E-05 | 9.1E-05 | 0.26       | 0.40     | 0.46     | 8.2E-05 | 9.4E-05 | 0.23       | 0.30     | 0.41     |
| <i>Prevotella sp CAG 485</i>        | 1.4E-04 | 1.3E-04 | 0.38       | 0.22     | 0.45     | 1.3E-04 | 1.1E-04 | 0.33       | 0.16     | 0.35     | 1.3E-04 | 1.0E-04 | 0.35       | 0.02     | 0.33     |
| <i>Enorma massiliensis</i>          | 1.7E-04 | 1.6E-04 | 0.16       | 0.23     | 0.45     | 6.4E-05 | 2.5E-04 | 0.11       | 0.72     | 0.49     | 4.5E-05 | 1.4E-04 | 0.09       | 0.41     | 0.42     |
| <i>Clostridium clostridioforme</i>  | 5.4E-04 | 2.9E-04 | 0.16       | 0.23     | 0.45     | 9.6E-05 | 8.5E-04 | 0.09       | 0.84     | 0.49     | 8.0E-05 | 8.1E-04 | 0.07       | 0.97     | 0.50     |
| <i>Bacteroides cellulosilyticus</i> | 3.7E-03 | 4.0E-03 | 0.49       | 0.25     | 0.45     | 2.9E-03 | 3.3E-03 | 0.47       | 0.24     | 0.38     | 1.5E-03 | 5.2E-03 | 0.48       | 0.08     | 0.34     |
| <i>Gordonibacter pamelaee</i>       | 2.6E-04 | 1.9E-04 | 0.40       | 0.25     | 0.45     | 3.8E-04 | 3.1E-04 | 0.39       | 0.45     | 0.48     | 3.5E-04 | 2.1E-04 | 0.39       | 0.32     | 0.41     |
| <i>Bacteroides sp OM05 12</i>       | 3.5E-04 | 7.8E-04 | 0.30       | 0.25     | 0.45     | 3.3E-04 | 5.1E-04 | 0.28       | 0.81     | 0.49     | 3.6E-04 | 6.2E-04 | 0.29       | 0.74     | 0.48     |
| <i>Turicimonas muris</i>            | 3.1E-04 | 2.8E-04 | 0.42       | 0.25     | 0.45     | 4.6E-04 | 3.0E-04 | 0.34       | 0.35     | 0.46     | 4.0E-04 | 4.1E-04 | 0.38       | 0.95     | 0.50     |
| <i>Prevotella sp CAG 520</i>        | 4.4E-03 | 2.3E-03 | 0.43       | 0.26     | 0.45     | 9.0E-04 | 9.3E-04 | 0.36       | 0.71     | 0.49     | 5.6E-03 | 2.7E-03 | 0.48       | 0.89     | 0.50     |
| <i>Dialister invisus</i>            | 1.2E-03 | 7.9E-04 | 0.17       | 0.26     | 0.45     | 6.8E-04 | 2.0E-04 | 0.10       | 0.48     | 0.49     | 2.7E-04 | 4.5E-04 | 0.10       | 0.15     | 0.37     |
| <i>Paraprevotella xylaniphila</i>   | 1.0E-03 | 7.3E-04 | 0.32       | 0.27     | 0.45     | 1.4E-03 | 1.0E-03 | 0.37       | 0.63     | 0.49     | 9.8E-04 | 1.5E-03 | 0.33       | 0.43     | 0.42     |
| <i>Oscillibacter sp CAG 241</i>     | 1.4E-03 | 1.2E-03 | 0.46       | 0.27     | 0.45     | 1.4E-03 | 1.7E-03 | 0.48       | 0.00     | 0.10     | 1.8E-03 | 8.8E-04 | 0.42       | 0.44     | 0.43     |
| <i>Roseburia sp CAG 471</i>         | 1.2E-04 | 2.0E-04 | 0.23       | 0.27     | 0.45     | 1.5E-04 | 1.6E-04 | 0.20       | 0.55     | 0.49     | 8.2E-05 | 7.2E-05 | 0.15       | 0.74     | 0.48     |
| <i>Rhodococcus kroppenstedtii</i>   | 1.1E-04 | 9.7E-05 | 0.36       | 0.27     | 0.45     | 1.0E-04 | 9.0E-05 | 0.32       | 0.86     | 0.49     | 1.2E-04 | 8.7E-05 | 0.26       | 0.47     | 0.43     |
| <i>Bilophila wadsworthia</i>        | 1.3E-03 | 1.4E-03 | 0.76       | 0.27     | 0.45     | 2.1E-03 | 2.2E-03 | 0.81       | 0.11     | 0.35     | 2.0E-03 | 2.3E-03 | 0.82       | 0.68     | 0.48     |
| <i>Roseburia hominis</i>            | 1.0E-02 | 1.2E-02 | 0.90       | 0.27     | 0.45     | 1.4E-02 | 1.1E-02 | 0.90       | 0.30     | 0.41     | 8.0E-03 | 7.9E-03 | 0.89       | 0.46     | 0.43     |
| <i>Corynebacterium variabile</i>    | 1.3E-04 | 9.5E-05 | 0.27       | 0.27     | 0.45     | 1.1E-04 | 1.2E-04 | 0.33       | 0.70     | 0.49     | 9.0E-05 | 8.4E-05 | 0.24       | 0.56     | 0.45     |
| <i>Holdemanella bififormis</i>      | 2.1E-03 | 2.4E-03 | 0.20       | 0.28     | 0.45     | 2.1E-03 | 1.7E-03 | 0.22       | 0.39     | 0.46     | 1.7E-03 | 2.1E-03 | 0.20       | 0.14     | 0.37     |
| <i>Cutibacterium acnes</i>          | 1.8E-04 | 2.8E-04 | 0.46       | 0.29     | 0.45     | 1.1E-04 | 9.7E-05 | 0.26       | 0.41     | 0.47     | 3.0E-04 | 2.3E-04 | 0.41       | 0.52     | 0.45     |
| <i>Eubacterium ramulus</i>          | 1.4E-03 | 1.1E-03 | 0.80       | 0.29     | 0.45     | 2.6E-03 | 1.2E-03 | 0.83       | 0.01     | 0.12     | 2.0E-03 | 1.6E-03 | 0.83       | 0.17     | 0.37     |
| <i>Rothia aeria</i>                 | 7.4E-05 | 6.6E-05 | 0.16       | 0.29     | 0.45     | 6.0E-05 | 7.1E-05 | 0.16       | 0.99     | 0.50     | 6.2E-05 | 7.3E-05 | 0.18       | 0.24     | 0.37     |
| <i>Streptococcus oralis</i>         | 1.1E-04 | 7.7E-05 | 0.20       | 0.29     | 0.45     | 1.4E-04 | 9.2E-05 | 0.21       | 0.19     | 0.36     | 1.2E-04 | 5.3E-05 | 0.16       | 0.54     | 0.45     |
| <i>Eubacterium ventriosum</i>       | 3.8E-03 | 2.2E-03 | 0.69       | 0.30     | 0.46     | 3.9E-03 | 2.8E-03 | 0.74       | 0.53     | 0.49     | 2.1E-03 | 1.7E-03 | 0.63       | 0.99     | 0.50     |
| <i>Coprobacter secundus</i>         | 1.4E-04 | 1.0E-04 | 0.35       | 0.32     | 0.46     | 1.0E-04 | 1.5E-04 | 0.30       | 0.16     | 0.35     | 9.4E-05 | 2.3E-04 | 0.30       | 0.31     | 0.41     |
| <i>Bacteroides fragilis</i>         | 9.6E-04 | 1.7E-03 | 0.78       | 0.32     | 0.46     | 5.0E-04 | 2.6E-03 | 0.75       | 0.42     | 0.47     | 9.8E-04 | 4.6E-04 | 0.80       | 0.90     | 0.50     |
| <i>Streptococcus sanguinis</i>      | 4.2E-05 | 3.5E-05 | 0.11       | 0.32     | 0.46     | 6.6E-05 | 1.3E-04 | 0.17       | 0.77     | 0.49     | 5.6E-05 | 7.6E-05 | 0.14       | 0.43     | 0.43     |
| <i>Actinomyces sp ICM47</i>         | 1.8E-04 | 1.4E-04 | 0.32       | 0.32     | 0.46     | 1.2E-04 | 1.4E-04 | 0.29       | 0.99     | 0.50     | 2.0E-04 | 2.2E-04 | 0.39       | 0.65     | 0.48     |



**Table S2. The relative abundance and prevalence of microbial species included in the current analysis.**

| Species                                 | T1      |         |            |          |          | T2      |         |            |          |          | T3      |         |            |          |          |
|-----------------------------------------|---------|---------|------------|----------|----------|---------|---------|------------|----------|----------|---------|---------|------------|----------|----------|
|                                         | Mean    | Mean    | Prevalence | Wilcoxon | Wilcoxon | Mean    | Mean    | Prevalence | Wilcoxon | Wilcoxon | Mean    | Mean    | Prevalence | Wilcoxon | Wilcoxon |
|                                         | case    | control |            | P        | FDR      | case    | control |            | P        | FDR      | case    | control |            | P        | FDR      |
| <i>Prevotella sp 885</i>                | 8.0E-04 | 7.2E-05 | 0.17       | 0.32     | 0.46     | 6.8E-05 | 6.6E-05 | 0.18       | 0.25     | 0.38     | 8.4E-05 | 8.9E-05 | 0.19       | 0.42     | 0.42     |
| <i>Atopobium rimae</i>                  | 1.9E-04 | 8.9E-05 | 0.21       | 0.33     | 0.46     | 7.6E-05 | 8.3E-05 | 0.14       | 0.71     | 0.49     | 8.5E-05 | 9.2E-05 | 0.18       | 0.44     | 0.43     |
| <i>Parabacteroides johnsonii</i>        | 7.3E-04 | 7.1E-04 | 0.15       | 0.33     | 0.46     | 7.1E-04 | 5.6E-04 | 0.15       | 0.15     | 0.35     | 5.6E-04 | 3.8E-04 | 0.14       | 0.33     | 0.41     |
| <i>Prevotella sp CAG 1185</i>           | 1.4E-04 | 9.0E-05 | 0.31       | 0.33     | 0.46     | 9.0E-05 | 7.2E-05 | 0.25       | 0.12     | 0.35     | 9.1E-05 | 1.2E-04 | 0.33       | 0.11     | 0.37     |
| <i>Bacteroides intestinalis</i>         | 1.9E-03 | 1.4E-03 | 0.36       | 0.33     | 0.46     | 1.9E-03 | 1.2E-03 | 0.30       | 0.69     | 0.49     | 1.8E-03 | 6.5E-04 | 0.33       | 0.62     | 0.47     |
| <i>Bacteroides uniformis</i>            | 9.6E-03 | 1.9E-02 | 0.27       | 0.34     | 0.46     | 2.2E-02 | 1.9E-02 | 0.31       | 0.37     | 0.46     | 2.5E-02 | 1.1E-02 | 0.29       | 0.65     | 0.48     |
| <i>Oxalobacter formigenes</i>           | 2.7E-04 | 2.7E-04 | 0.22       | 0.34     | 0.46     | 4.7E-04 | 2.9E-04 | 0.20       | 0.04     | 0.21     | 3.0E-04 | 1.2E-04 | 0.12       | 0.34     | 0.41     |
| <i>Slackia exigua</i>                   | 6.9E-05 | 5.3E-05 | 0.16       | 0.34     | 0.46     | 5.2E-05 | 7.0E-05 | 0.10       | 0.91     | 0.49     | 5.4E-05 | 7.2E-05 | 0.17       | 0.16     | 0.37     |
| <i>Odoribacter splanchnicus</i>         | 4.5E-03 | 4.6E-03 | 0.78       | 0.34     | 0.46     | 4.4E-03 | 5.5E-03 | 0.77       | 0.23     | 0.38     | 6.0E-03 | 6.3E-03 | 0.80       | 1.00     | 0.50     |
| <i>Hungatella hathewayi</i>             | 9.5E-04 | 4.4E-04 | 0.30       | 0.35     | 0.46     | 3.1E-04 | 3.6E-04 | 0.25       | 0.78     | 0.49     | 1.8E-04 | 3.7E-04 | 0.21       | 0.09     | 0.34     |
| <i>Roseburia sp CAG 182</i>             | 6.5E-04 | 2.0E-03 | 0.14       | 0.36     | 0.46     | 5.4E-04 | 4.4E-04 | 0.17       | 0.79     | 0.49     | 3.5E-04 | 3.8E-04 | 0.12       | 0.55     | 0.45     |
| <i>Monoglobus pectinilyticus</i>        | 1.0E-04 | 3.8E-04 | 0.12       | 0.39     | 0.46     | 4.3E-04 | 2.1E-04 | 0.10       | 0.93     | 0.49     | 5.6E-04 | 2.1E-04 | 0.11       | 0.99     | 0.50     |
| <i>Streptococcus vestibularis</i>       | 3.8E-05 | 4.0E-05 | 0.09       | 0.39     | 0.46     | 1.2E-04 | 1.5E-04 | 0.22       | 0.77     | 0.49     | 2.0E-04 | 1.4E-04 | 0.24       | 0.67     | 0.48     |
| <i>Parabacteroides merdae</i>           | 9.8E-03 | 1.2E-02 | 0.80       | 0.40     | 0.46     | 1.1E-02 | 1.5E-02 | 0.86       | 0.03     | 0.20     | 1.0E-02 | 1.6E-02 | 0.79       | 0.17     | 0.37     |
| <i>Streptococcus parasanguinis</i>      | 2.2E-03 | 2.1E-03 | 0.85       | 0.40     | 0.46     | 2.4E-03 | 3.0E-03 | 0.88       | 0.54     | 0.49     | 2.4E-03 | 2.4E-03 | 0.86       | 0.36     | 0.41     |
| <i>Prevotella intermedia</i>            | 6.0E-05 | 4.9E-05 | 0.20       | 0.41     | 0.46     | 4.9E-05 | 3.8E-05 | 0.12       | 0.19     | 0.36     | 4.6E-05 | 6.6E-05 | 0.15       | 0.93     | 0.50     |
| <i>Porphyromonas asaccharolytica</i>    | 1.2E-04 | 1.8E-04 | 0.31       | 0.42     | 0.46     | 8.2E-05 | 1.0E-04 | 0.30       | 0.68     | 0.49     | 1.2E-04 | 1.0E-04 | 0.32       | 0.31     | 0.41     |
| <i>Actinomyces turicensis</i>           | 2.4E-04 | 2.2E-04 | 0.50       | 0.42     | 0.46     | 1.8E-04 | 2.4E-04 | 0.50       | 0.81     | 0.49     | 2.9E-04 | 3.0E-04 | 0.52       | 0.17     | 0.37     |
| <i>Micrococcus luteus</i>               | 1.3E-04 | 9.3E-05 | 0.37       | 0.42     | 0.46     | 7.5E-05 | 9.7E-05 | 0.27       | 0.95     | 0.49     | 8.6E-05 | 7.1E-05 | 0.26       | 0.23     | 0.37     |
| <i>Prevotella sp CAG 5226</i>           | 7.9E-05 | 6.1E-05 | 0.18       | 0.42     | 0.46     | 6.0E-05 | 5.2E-04 | 0.20       | 0.03     | 0.21     | 3.5E-04 | 3.9E-04 | 0.21       | 0.63     | 0.48     |
| <i>Brevibacterium linens</i>            | 1.2E-04 | 9.9E-05 | 0.36       | 0.42     | 0.46     | 8.9E-05 | 9.0E-05 | 0.34       | 0.52     | 0.49     | 9.3E-05 | 1.1E-04 | 0.33       | 0.67     | 0.48     |
| <i>Dysgonamonadaceae bacterium</i>      | 6.4E-05 | 9.8E-05 | 0.14       | 0.43     | 0.46     | 5.5E-05 | 3.6E-05 | 0.09       | 0.06     | 0.31     | 5.8E-05 | 3.2E-05 | 0.14       | 0.15     | 0.37     |
| <i>Clostridium sp CAG 299</i>           | 1.0E-03 | 7.0E-04 | 0.32       | 0.43     | 0.46     | 1.7E-03 | 2.0E-03 | 0.38       | 0.27     | 0.39     | 1.2E-03 | 4.1E-04 | 0.33       | 0.00     | 0.14     |
| <i>Eubacterium siraeum</i>              | 1.4E-02 | 1.7E-02 | 0.61       | 0.43     | 0.46     | 1.3E-02 | 1.1E-02 | 0.59       | 0.85     | 0.49     | 1.2E-02 | 1.0E-02 | 0.49       | 0.04     | 0.34     |
| <i>Intestinimonas butyriciproducens</i> | 5.1E-04 | 4.5E-04 | 0.38       | 0.44     | 0.46     | 6.1E-04 | 3.7E-04 | 0.39       | 0.34     | 0.45     | 7.9E-04 | 2.6E-04 | 0.29       | 0.92     | 0.50     |
| <i>Eubacterium hallii</i>               | 3.4E-03 | 3.0E-03 | 0.93       | 0.45     | 0.46     | 3.2E-03 | 3.2E-03 | 0.95       | 0.97     | 0.49     | 2.8E-03 | 2.6E-03 | 0.91       | 0.81     | 0.49     |
| <i>Aeriscardovia aeriphila</i>          | 1.5E-04 | 1.8E-04 | 0.36       | 0.45     | 0.46     | 1.2E-04 | 1.4E-04 | 0.27       | 0.40     | 0.46     | 1.4E-04 | 1.4E-04 | 0.32       | 0.72     | 0.48     |
| <i>Gemella sanguinis</i>                | 1.4E-04 | 8.1E-05 | 0.22       | 0.45     | 0.46     | 1.2E-04 | 9.2E-05 | 0.25       | 0.31     | 0.41     | 1.3E-04 | 1.2E-04 | 0.23       | 0.41     | 0.42     |
| <i>Olsenella uli</i>                    | 8.8E-05 | 6.2E-05 | 0.14       | 0.45     | 0.46     | 6.6E-05 | 7.2E-05 | 0.13       | 0.43     | 0.48     | 5.9E-05 | 8.2E-05 | 0.18       | 0.06     | 0.34     |

**Table S2. The relative abundance and prevalence of microbial species included in the current analysis.**

| Species                              | T1      |         |            |          |          | T2      |         |            |          |          | T3      |         |            |          |          |
|--------------------------------------|---------|---------|------------|----------|----------|---------|---------|------------|----------|----------|---------|---------|------------|----------|----------|
|                                      | Mean    | Mean    | Prevalence | Wilcoxon | Wilcoxon | Mean    | Mean    | Prevalence | Wilcoxon | Wilcoxon | Mean    | Mean    | Prevalence | Wilcoxon | Wilcoxon |
|                                      | case    | control |            | P        | FDR      | case    | control |            | P        | FDR      | case    | control |            | P        | FDR      |
| <i>Dietzia alimentaria</i>           | 1.1E-04 | 7.4E-05 | 0.16       | 0.45     | 0.46     | 8.3E-05 | 6.3E-05 | 0.17       | 0.98     | 0.50     | 1.1E-04 | 1.5E-04 | 0.23       | 0.40     | 0.42     |
| <i>Prevotella sp CAG 279</i>         | 4.9E-03 | 3.1E-03 | 0.29       | 0.46     | 0.46     | 4.3E-03 | 2.9E-03 | 0.40       | 0.92     | 0.49     | 3.1E-03 | 6.2E-03 | 0.43       | 0.63     | 0.48     |
| <i>Delftia tsuruhatensis</i>         | 9.8E-05 | 7.6E-05 | 0.16       | 0.46     | 0.46     | 1.1E-04 | 8.6E-05 | 0.13       | 0.61     | 0.49     | 1.7E-04 | 1.2E-04 | 0.23       | 0.95     | 0.50     |
| <i>Prevotella histicola</i>          | 4.5E-05 | 5.5E-05 | 0.16       | 0.46     | 0.46     | 6.4E-05 | 3.3E-05 | 0.14       | 0.19     | 0.36     | 5.1E-05 | 1.2E-04 | 0.13       | 0.93     | 0.50     |
| <i>Parabacteroides goldsteinii</i>   | 9.2E-04 | 5.6E-04 | 0.33       | 0.46     | 0.46     | 1.3E-03 | 5.5E-04 | 0.31       | 0.30     | 0.41     | 7.7E-04 | 4.9E-04 | 0.32       | 0.49     | 0.44     |
| <i>Prevotella sp CAG 617</i>         | 1.3E-03 | 5.2E-04 | 0.19       | 0.46     | 0.46     | 1.8E-03 | 4.9E-04 | 0.19       | 0.16     | 0.35     | 8.6E-04 | 7.2E-04 | 0.16       | 0.39     | 0.42     |
| <i>Allisonella histaminiformans</i>  | 5.2E-05 | 4.4E-05 | 0.09       | 0.47     | 0.46     | 1.1E-04 | 4.6E-05 | 0.11       | 0.88     | 0.49     | 7.5E-05 | 6.7E-05 | 0.11       | 0.42     | 0.42     |
| <i>Ruminococcus lactaris</i>         | 6.5E-03 | 6.1E-03 | 0.62       | 0.47     | 0.46     | 7.3E-03 | 6.7E-03 | 0.62       | 0.76     | 0.49     | 5.9E-03 | 5.5E-03 | 0.63       | 0.27     | 0.39     |
| <i>Bacteroides massiliensis</i>      | 7.5E-04 | 2.4E-04 | 0.41       | 0.47     | 0.46     | 8.7E-04 | 2.2E-04 | 0.39       | 1.00     | 0.50     | 5.7E-04 | 4.3E-04 | 0.40       | 0.03     | 0.34     |
| <i>Atopobium parvulum</i>            | 1.7E-04 | 1.3E-04 | 0.41       | 0.47     | 0.46     | 9.0E-05 | 1.2E-04 | 0.30       | 0.87     | 0.49     | 9.2E-05 | 9.4E-05 | 0.27       | 0.51     | 0.45     |
| <i>Porphyromonas uenonis</i>         | 2.8E-04 | 1.5E-04 | 0.48       | 0.48     | 0.46     | 1.9E-04 | 1.4E-04 | 0.45       | 0.03     | 0.20     | 1.5E-04 | 2.0E-04 | 0.41       | 0.56     | 0.45     |
| <i>Actinomyces sp oral taxon 897</i> | 7.3E-05 | 1.3E-04 | 0.19       | 0.48     | 0.46     | 1.4E-04 | 1.4E-04 | 0.20       | 0.83     | 0.49     | 7.7E-05 | 1.5E-04 | 0.19       | 0.77     | 0.49     |
| <i>Bifidobacterium dentium</i>       | 1.4E-04 | 2.3E-04 | 0.34       | 0.48     | 0.46     | 1.0E-04 | 1.2E-04 | 0.28       | 0.19     | 0.36     | 1.4E-04 | 3.4E-04 | 0.44       | 0.03     | 0.34     |
| <i>Clostridium symbiosum</i>         | 7.7E-04 | 4.4E-04 | 0.29       | 0.48     | 0.46     | 3.5E-04 | 3.7E-04 | 0.21       | 0.95     | 0.49     | 3.3E-04 | 1.8E-04 | 0.13       | 0.01     | 0.15     |
| <i>Roseburia faecis</i>              | 2.8E-02 | 3.0E-02 | 0.96       | 0.48     | 0.46     | 2.9E-02 | 3.6E-02 | 0.97       | 0.22     | 0.38     | 2.1E-02 | 2.5E-02 | 0.94       | 0.25     | 0.38     |
| <i>Corynebacterium xerosis</i>       | 1.7E-04 | 1.7E-04 | 0.39       | 0.48     | 0.46     | 1.0E-04 | 1.2E-04 | 0.31       | 0.13     | 0.35     | 9.7E-05 | 1.4E-04 | 0.32       | 0.04     | 0.34     |
| <i>Rothia mucilaginosa</i>           | 2.0E-04 | 1.7E-04 | 0.74       | 0.50     | 0.46     | 1.7E-04 | 2.0E-04 | 0.67       | 0.42     | 0.47     | 3.3E-04 | 1.8E-04 | 0.70       | 0.85     | 0.50     |
| <i>Veillonella parvula</i>           | 5.9E-03 | 3.4E-03 | 0.73       | 0.51     | 0.46     | 3.6E-03 | 1.7E-03 | 0.67       | 0.10     | 0.35     | 4.3E-03 | 3.0E-03 | 0.70       | 0.24     | 0.37     |
| <i>Prevotella amnii</i>              | 3.3E-05 | 6.0E-05 | 0.10       | 0.51     | 0.46     | 5.2E-05 | 1.2E-04 | 0.17       | 0.23     | 0.38     | 7.4E-05 | 7.6E-05 | 0.14       | 0.84     | 0.50     |
| <i>Sanguibacter keddieii</i>         | 5.8E-05 | 4.5E-05 | 0.13       | 0.52     | 0.46     | 5.6E-05 | 4.6E-05 | 0.14       | 0.67     | 0.49     | 5.4E-05 | 6.3E-05 | 0.18       | 0.26     | 0.38     |
| <i>Clostridium leptum</i>            | 2.2E-04 | 7.5E-04 | 0.25       | 0.52     | 0.46     | 1.9E-04 | 5.5E-04 | 0.28       | 0.12     | 0.35     | 1.9E-04 | 2.2E-04 | 0.18       | 0.13     | 0.37     |
| <i>Collinsella aerofaciens</i>       | 5.4E-03 | 4.3E-03 | 0.77       | 0.52     | 0.46     | 6.7E-03 | 5.9E-03 | 0.83       | 0.63     | 0.49     | 7.6E-03 | 5.6E-03 | 0.84       | 0.43     | 0.42     |
| <i>Lactobacillus rogosae</i>         | 3.2E-04 | 1.7E-04 | 0.26       | 0.52     | 0.46     | 1.2E-04 | 2.0E-04 | 0.25       | 0.88     | 0.49     | 1.2E-04 | 1.3E-04 | 0.24       | 0.37     | 0.42     |
| <i>Tyzzerella nexilis</i>            | 2.8E-04 | 1.4E-04 | 0.14       | 0.52     | 0.46     | 1.3E-03 | 4.2E-04 | 0.12       | 0.08     | 0.35     | 4.4E-04 | 4.6E-04 | 0.13       | 0.93     | 0.50     |
| <i>Rothia sp</i>                     | 3.3E-04 | 2.8E-04 | 0.38       | 0.52     | 0.46     | 1.1E-04 | 1.5E-04 | 0.28       | 0.93     | 0.49     | 8.0E-05 | 1.5E-04 | 0.28       | 0.01     | 0.15     |
| <i>Coprococcus eutactus</i>          | 7.6E-03 | 8.5E-03 | 0.37       | 0.52     | 0.46     | 5.5E-03 | 9.3E-03 | 0.42       | 0.12     | 0.35     | 2.4E-03 | 5.5E-03 | 0.36       | 0.23     | 0.37     |
| <i>Neomicrococcus aestuarii</i>      | 7.1E-05 | 5.7E-05 | 0.18       | 0.52     | 0.46     | 5.8E-05 | 4.3E-05 | 0.13       | 0.14     | 0.35     | 5.7E-05 | 7.2E-05 | 0.20       | 0.36     | 0.41     |
| <i>Clostridium bolteae CAG 59</i>    | 1.6E-04 | 1.7E-04 | 0.16       | 0.53     | 0.46     | 8.4E-05 | 9.7E-05 | 0.15       | 0.19     | 0.36     | 1.2E-04 | 4.5E-05 | 0.09       | 0.60     | 0.47     |
| <i>Clostridium innocuum</i>          | 3.0E-04 | 2.0E-04 | 0.22       | 0.53     | 0.46     | 2.3E-04 | 2.1E-04 | 0.19       | 0.59     | 0.49     | 1.4E-04 | 1.9E-04 | 0.15       | 0.03     | 0.33     |

**Table S2. The relative abundance and prevalence of microbial species included in the current analysis.**

| Species                                     | T1      |         |            |          |          | T2      |         |            |          |          | T3      |         |            |          |          |
|---------------------------------------------|---------|---------|------------|----------|----------|---------|---------|------------|----------|----------|---------|---------|------------|----------|----------|
|                                             | Mean    | Mean    | Prevalence | Wilcoxon | Wilcoxon | Mean    | Mean    | Prevalence | Wilcoxon | Wilcoxon | Mean    | Mean    | Prevalence | Wilcoxon | Wilcoxon |
|                                             | case    | control |            | P        | FDR      | case    | control |            | P        | FDR      | case    | control |            | P        | FDR      |
| <i>Clostridium asparagiforme</i>            | 8.4E-05 | 1.0E-04 | 0.15       | 0.54     | 0.46     | 3.8E-05 | 5.6E-05 | 0.12       | 0.84     | 0.49     | 7.5E-05 | 4.8E-05 | 0.10       | 0.76     | 0.49     |
| <i>Prevotella sp CAG 1320</i>               | 1.5E-04 | 9.7E-05 | 0.32       | 0.54     | 0.46     | 8.8E-04 | 1.4E-04 | 0.30       | 0.26     | 0.39     | 9.0E-05 | 1.2E-04 | 0.32       | 0.34     | 0.41     |
| <i>Actinomyces meyeri</i>                   | 7.9E-05 | 6.9E-05 | 0.24       | 0.54     | 0.46     | 1.0E-04 | 1.2E-04 | 0.35       | 0.94     | 0.49     | 7.2E-05 | 8.1E-05 | 0.32       | 0.90     | 0.50     |
| <i>Corynebacterium durum</i>                | 1.6E-04 | 3.1E-04 | 0.26       | 0.54     | 0.46     | 9.6E-05 | 9.4E-05 | 0.18       | 0.41     | 0.47     | 9.8E-05 | 2.9E-04 | 0.18       | 0.73     | 0.48     |
| <i>Janibacter hoylei</i>                    | 5.7E-05 | 5.6E-05 | 0.21       | 0.54     | 0.46     | 4.6E-05 | 5.4E-05 | 0.15       | 0.73     | 0.49     | 5.2E-05 | 6.9E-05 | 0.20       | 0.37     | 0.41     |
| <i>Actinomyces sp oral taxon 180</i>        | 3.1E-05 | 2.6E-05 | 0.12       | 0.55     | 0.46     | 2.9E-05 | 2.7E-05 | 0.08       | 0.82     | 0.49     | 2.6E-05 | 4.8E-05 | 0.11       | 0.91     | 0.50     |
| <i>Bacteroides sp CAG 927</i>               | 8.7E-05 | 6.8E-05 | 0.26       | 0.55     | 0.46     | 5.3E-05 | 1.8E-04 | 0.20       | 0.92     | 0.49     | 8.6E-05 | 1.0E-04 | 0.28       | 0.14     | 0.37     |
| <i>Prevotella buccae</i>                    | 6.4E-05 | 5.4E-05 | 0.16       | 0.55     | 0.46     | 4.6E-05 | 6.3E-05 | 0.16       | 0.61     | 0.49     | 6.2E-05 | 6.1E-05 | 0.20       | 0.60     | 0.47     |
| <i>Bacteroides fingoldii</i>                | 2.9E-03 | 3.7E-03 | 0.54       | 0.56     | 0.46     | 2.8E-03 | 3.7E-03 | 0.60       | 0.45     | 0.48     | 7.0E-03 | 2.6E-03 | 0.58       | 0.94     | 0.50     |
| <i>Parabacteroides distasonis</i>           | 1.3E-02 | 1.5E-02 | 0.97       | 0.56     | 0.46     | 1.4E-02 | 1.5E-02 | 0.97       | 0.14     | 0.35     | 1.7E-02 | 1.5E-02 | 0.98       | 0.08     | 0.34     |
| <i>Lachnospira pectinoschiza</i>            | 2.8E-02 | 2.4E-02 | 0.81       | 0.56     | 0.46     | 4.0E-02 | 2.3E-02 | 0.79       | 0.78     | 0.49     | 2.7E-02 | 2.5E-02 | 0.82       | 0.93     | 0.50     |
| <i>Pseudarthrobacter phenanthrenivorans</i> | 1.0E-04 | 8.4E-05 | 0.23       | 0.56     | 0.46     | 9.8E-05 | 8.7E-05 | 0.24       | 0.53     | 0.49     | 8.6E-05 | 9.5E-05 | 0.24       | 0.06     | 0.34     |
| <i>Butyrivimonas virosa</i>                 | 4.0E-04 | 3.0E-04 | 0.64       | 0.56     | 0.46     | 6.8E-04 | 7.2E-04 | 0.67       | 0.23     | 0.38     | 5.8E-04 | 4.3E-04 | 0.68       | 0.35     | 0.41     |
| <i>Prevotella copri</i>                     | 6.7E-02 | 5.1E-02 | 0.92       | 0.56     | 0.46     | 6.6E-02 | 5.7E-02 | 0.91       | 0.76     | 0.49     | 8.1E-02 | 9.7E-02 | 0.95       | 0.91     | 0.50     |
| <i>Megamonas hypermegale</i>                | 1.6E-03 | 8.5E-04 | 0.32       | 0.57     | 0.46     | 2.2E-03 | 1.8E-03 | 0.40       | 0.16     | 0.35     | 1.1E-03 | 1.8E-03 | 0.40       | 0.23     | 0.37     |
| <i>Eubacterium sp OM08 24</i>               | 2.0E-03 | 1.9E-03 | 0.20       | 0.58     | 0.46     | 3.6E-03 | 6.1E-04 | 0.15       | 0.68     | 0.49     | 8.7E-04 | 7.4E-04 | 0.24       | 0.78     | 0.49     |
| <i>Firmicutes bacterium CAG 170</i>         | 3.3E-04 | 1.9E-04 | 0.17       | 0.58     | 0.46     | 3.7E-04 | 1.2E-03 | 0.18       | 0.79     | 0.49     | 2.4E-04 | 2.2E-04 | 0.13       | 0.91     | 0.50     |
| <i>Kocuria rosea</i>                        | 7.5E-05 | 7.1E-05 | 0.24       | 0.58     | 0.46     | 5.6E-05 | 5.7E-05 | 0.16       | 0.82     | 0.49     | 7.5E-05 | 7.1E-05 | 0.25       | 0.87     | 0.50     |
| <i>Veillonella infantium</i>                | 2.1E-04 | 1.4E-04 | 0.26       | 0.59     | 0.46     | 1.9E-04 | 2.1E-04 | 0.21       | 0.16     | 0.35     | 4.4E-04 | 1.5E-04 | 0.19       | 0.70     | 0.48     |
| <i>Bacteroides galacturonicus</i>           | 3.2E-04 | 3.1E-04 | 0.56       | 0.59     | 0.46     | 2.4E-04 | 2.0E-04 | 0.46       | 0.66     | 0.49     | 2.3E-04 | 2.7E-04 | 0.52       | 0.22     | 0.37     |
| <i>Actinomyces odontolyticus</i>            | 1.1E-04 | 1.3E-04 | 0.21       | 0.59     | 0.46     | 1.6E-04 | 1.1E-04 | 0.16       | 0.94     | 0.49     | 1.1E-04 | 1.0E-04 | 0.19       | 0.50     | 0.44     |
| <i>Streptococcus anginosus group</i>        | 4.0E-05 | 8.6E-05 | 0.11       | 0.62     | 0.47     | 9.4E-05 | 1.2E-04 | 0.18       | 0.28     | 0.40     | 4.5E-05 | 4.7E-05 | 0.12       | 0.89     | 0.50     |
| <i>Streptococcus mitis</i>                  | 1.0E-04 | 5.8E-05 | 0.16       | 0.62     | 0.47     | 1.2E-04 | 7.7E-05 | 0.17       | 0.13     | 0.35     | 6.2E-05 | 4.0E-05 | 0.16       | 0.17     | 0.37     |
| <i>Veillonella atypica</i>                  | 1.3E-03 | 1.3E-03 | 0.41       | 0.63     | 0.47     | 8.1E-04 | 1.3E-03 | 0.39       | 0.31     | 0.41     | 1.3E-03 | 1.1E-03 | 0.39       | 0.81     | 0.49     |
| <i>Akkermansia muciniphila</i>              | 9.2E-03 | 7.1E-03 | 0.50       | 0.63     | 0.47     | 8.8E-03 | 5.3E-03 | 0.46       | 0.65     | 0.49     | 4.0E-03 | 2.5E-03 | 0.36       | 0.15     | 0.37     |
| <i>Actinomyces cardiffensis</i>             | 2.1E-04 | 2.1E-04 | 0.54       | 0.64     | 0.47     | 2.1E-04 | 1.7E-04 | 0.55       | 0.03     | 0.20     | 2.0E-04 | 2.0E-04 | 0.55       | 0.81     | 0.49     |
| <i>Corynebacterium hadale</i>               | 6.9E-05 | 6.7E-05 | 0.18       | 0.64     | 0.47     | 6.1E-05 | 6.5E-05 | 0.13       | 0.74     | 0.49     | 5.8E-05 | 6.8E-05 | 0.20       | 1.00     | 0.50     |
| <i>Micrococcus aloeverae</i>                | 4.6E-04 | 4.2E-04 | 0.71       | 0.65     | 0.47     | 4.0E-04 | 5.0E-04 | 0.69       | 0.50     | 0.49     | 6.4E-04 | 4.6E-04 | 0.73       | 0.08     | 0.34     |

**Table S2. The relative abundance and prevalence of microbial species included in the current analysis.**

| Species                                | T1      |         |            |          |          | T2      |         |            |          |          | T3      |         |            |          |          |
|----------------------------------------|---------|---------|------------|----------|----------|---------|---------|------------|----------|----------|---------|---------|------------|----------|----------|
|                                        | Mean    | Mean    | Prevalence | Wilcoxon | Wilcoxon | Mean    | Mean    | Prevalence | Wilcoxon | Wilcoxon | Mean    | Mean    | Prevalence | Wilcoxon | Wilcoxon |
|                                        | case    | control |            | P        | FDR      | case    | control |            | P        | FDR      | case    | control |            | P        | FDR      |
| <i>Clostridium bolteae</i>             | 1.2E-03 | 1.2E-03 | 0.51       | 0.65     | 0.47     | 7.3E-04 | 1.5E-03 | 0.48       | 0.96     | 0.49     | 5.3E-04 | 4.7E-04 | 0.39       | 0.10     | 0.37     |
| <i>Lawsonella clevelandensis</i>       | 8.4E-05 | 8.2E-05 | 0.29       | 0.65     | 0.47     | 6.4E-05 | 9.8E-05 | 0.24       | 0.09     | 0.35     | 8.5E-05 | 8.7E-05 | 0.30       | 0.68     | 0.48     |
| <i>Bacteroides caccae</i>              | 5.4E-03 | 3.5E-03 | 0.35       | 0.65     | 0.47     | 5.6E-03 | 4.1E-03 | 0.34       | 0.56     | 0.49     | 7.8E-03 | 5.3E-03 | 0.36       | 0.37     | 0.41     |
| <i>Alistipes finegoldii</i>            | 1.2E-02 | 8.7E-03 | 0.71       | 0.65     | 0.47     | 7.5E-03 | 8.3E-03 | 0.75       | 0.17     | 0.36     | 1.4E-02 | 6.6E-03 | 0.70       | 0.98     | 0.50     |
| <i>Roseburia sp CAG 303</i>            | 7.0E-04 | 9.1E-04 | 0.33       | 0.65     | 0.47     | 1.2E-03 | 1.2E-03 | 0.30       | 0.93     | 0.49     | 1.1E-03 | 1.5E-03 | 0.30       | 0.68     | 0.48     |
| <i>Bifidobacterium adolescentis</i>    | 4.2E-04 | 3.9E-04 | 0.39       | 0.66     | 0.47     | 4.3E-04 | 1.6E-03 | 0.33       | 0.14     | 0.35     | 4.9E-04 | 9.1E-04 | 0.38       | 0.52     | 0.45     |
| <i>Paraprevotella clara</i>            | 4.6E-04 | 1.2E-04 | 0.29       | 0.66     | 0.47     | 3.5E-04 | 1.9E-04 | 0.31       | 0.61     | 0.49     | 8.9E-05 | 1.9E-04 | 0.34       | 0.12     | 0.37     |
| <i>Anaerotruncus colihominis</i>       | 6.2E-04 | 1.3E-03 | 0.46       | 0.66     | 0.47     | 1.1E-03 | 9.6E-04 | 0.41       | 0.16     | 0.35     | 5.8E-04 | 3.8E-04 | 0.33       | 0.20     | 0.37     |
| <i>Methanobrevibacter arboriphilus</i> | 1.5E-04 | 1.3E-04 | 0.39       | 0.67     | 0.47     | 1.7E-04 | 1.4E-04 | 0.38       | 0.72     | 0.49     | 1.2E-04 | 1.2E-04 | 0.35       | 0.93     | 0.50     |
| <i>Collinsella intestinalis</i>        | 1.8E-04 | 1.3E-04 | 0.25       | 0.67     | 0.47     | 1.5E-04 | 1.5E-04 | 0.18       | 0.90     | 0.49     | 1.5E-04 | 1.8E-04 | 0.17       | 0.01     | 0.15     |
| <i>Eubacterium rectale</i>             | 6.5E-02 | 6.8E-02 | 0.96       | 0.68     | 0.47     | 5.4E-02 | 6.1E-02 | 0.98       | 0.65     | 0.49     | 5.0E-02 | 3.9E-02 | 0.98       | 0.77     | 0.49     |
| <i>Clostridium sp CAG 242</i>          | 8.1E-04 | 1.0E-03 | 0.22       | 0.68     | 0.47     | 9.3E-04 | 5.5E-04 | 0.23       | 0.94     | 0.49     | 3.3E-04 | 4.2E-04 | 0.17       | 0.77     | 0.49     |
| <i>Cutibacterium avidum</i>            | 5.3E-05 | 4.0E-05 | 0.11       | 0.68     | 0.47     | 3.2E-05 | 3.2E-05 | 0.07       | 0.89     | 0.49     | 4.0E-05 | 6.2E-05 | 0.15       | 0.07     | 0.34     |
| <i>Flavonifractor plautii</i>          | 6.9E-03 | 5.1E-03 | 0.89       | 0.69     | 0.47     | 5.6E-03 | 3.9E-03 | 0.86       | 0.29     | 0.41     | 6.8E-03 | 5.6E-03 | 0.86       | 0.02     | 0.33     |
| <i>Bacteroides coprocola</i>           | 3.6E-03 | 1.4E-03 | 0.21       | 0.69     | 0.47     | 1.7E-03 | 2.3E-03 | 0.20       | 0.39     | 0.46     | 2.0E-04 | 1.7E-03 | 0.21       | 0.06     | 0.34     |
| <i>Bacteroides sp D2</i>               | 2.1E-04 | 1.9E-04 | 0.20       | 0.70     | 0.47     | 1.4E-04 | 1.5E-04 | 0.21       | 0.12     | 0.35     | 1.5E-04 | 3.3E-04 | 0.25       | 0.01     | 0.15     |
| <i>Oscillibacter sp 57 20</i>          | 4.5E-03 | 4.8E-03 | 0.77       | 0.71     | 0.47     | 3.1E-03 | 4.9E-03 | 0.80       | 0.01     | 0.12     | 4.3E-03 | 4.0E-03 | 0.79       | 0.64     | 0.48     |
| <i>Streptococcus salivarius</i>        | 5.4E-03 | 5.7E-03 | 0.98       | 0.71     | 0.47     | 7.4E-03 | 8.8E-03 | 1.00       | 0.51     | 0.49     | 7.7E-03 | 7.4E-03 | 0.97       | 1.00     | 0.50     |
| <i>Parascardovia denticolens</i>       | 1.6E-04 | 1.6E-04 | 0.61       | 0.72     | 0.47     | 1.6E-04 | 1.3E-04 | 0.56       | 0.25     | 0.39     | 1.9E-04 | 1.7E-04 | 0.57       | 0.75     | 0.49     |
| <i>Butyrivibrio synergistica</i>       | 2.1E-04 | 2.4E-04 | 0.26       | 0.72     | 0.47     | 2.7E-04 | 2.8E-04 | 0.27       | 0.03     | 0.20     | 2.4E-04 | 1.9E-04 | 0.26       | 1.00     | 0.50     |
| <i>Coprococcus catus</i>               | 9.2E-04 | 8.4E-04 | 0.66       | 0.72     | 0.47     | 1.4E-03 | 9.9E-04 | 0.68       | 0.74     | 0.49     | 1.3E-03 | 8.8E-04 | 0.70       | 0.23     | 0.37     |
| <i>Eubacterium sp CAG 274</i>          | 5.6E-03 | 3.9E-03 | 0.61       | 0.72     | 0.47     | 1.0E-02 | 6.2E-03 | 0.66       | 0.39     | 0.46     | 6.3E-03 | 3.6E-03 | 0.61       | 0.07     | 0.34     |
| <i>Faecalibacterium prausnitzii</i>    | 4.0E-02 | 3.9E-02 | 1.00       | 0.72     | 0.47     | 4.7E-02 | 3.9E-02 | 1.00       | 0.25     | 0.38     | 4.8E-02 | 4.0E-02 | 1.00       | 0.23     | 0.37     |
| <i>Roseburia intestinalis</i>          | 5.6E-03 | 5.9E-03 | 0.72       | 0.72     | 0.47     | 5.6E-03 | 5.3E-03 | 0.73       | 0.81     | 0.49     | 3.4E-03 | 5.5E-03 | 0.70       | 0.45     | 0.43     |
| <i>Actinomyces sp oral taxon 448</i>   | 1.8E-04 | 1.7E-04 | 0.50       | 0.73     | 0.47     | 1.5E-04 | 1.4E-04 | 0.50       | 0.42     | 0.47     | 1.6E-04 | 1.7E-04 | 0.51       | 0.94     | 0.50     |
| <i>Klebsiella quasipneumoniae</i>      | 2.1E-04 | 3.8E-04 | 0.24       | 0.74     | 0.47     | 4.7E-04 | 5.1E-04 | 0.25       | 0.19     | 0.36     | 3.8E-04 | 2.3E-04 | 0.17       | 0.74     | 0.48     |
| <i>Roseburia inulinivorans</i>         | 2.7E-02 | 2.6E-02 | 0.98       | 0.74     | 0.47     | 2.4E-02 | 1.4E-02 | 0.99       | 0.10     | 0.35     | 1.8E-02 | 1.5E-02 | 0.93       | 0.74     | 0.48     |
| <i>Eggerthella lenta</i>               | 6.9E-04 | 8.9E-04 | 0.53       | 0.75     | 0.47     | 6.5E-04 | 2.2E-04 | 0.54       | 0.00     | 0.01     | 5.2E-04 | 3.6E-04 | 0.60       | 0.59     | 0.46     |
| <i>Desulfovibrio piger</i>             | 2.3E-03 | 2.0E-03 | 0.21       | 0.75     | 0.47     | 2.3E-03 | 2.7E-03 | 0.20       | 0.80     | 0.49     | 1.8E-03 | 2.3E-03 | 0.19       | 0.95     | 0.50     |

**Table S2. The relative abundance and prevalence of microbial species included in the current analysis.**

| Species                                 | T1      |         |            |          |          | T2      |         |            |          |          | T3      |         |            |          |          |
|-----------------------------------------|---------|---------|------------|----------|----------|---------|---------|------------|----------|----------|---------|---------|------------|----------|----------|
|                                         | Mean    | Mean    | Prevalence | Wilcoxon | Wilcoxon | Mean    | Mean    | Prevalence | Wilcoxon | Wilcoxon | Mean    | Mean    | Prevalence | Wilcoxon | Wilcoxon |
|                                         | case    | control |            | P        | FDR      | case    | control |            | P        | FDR      | case    | control |            | P        | FDR      |
| <i>Janibacter indicus</i>               | 5.3E-05 | 4.1E-05 | 0.13       | 0.75     | 0.47     | 3.5E-05 | 3.6E-05 | 0.13       | 0.92     | 0.49     | 3.9E-05 | 4.4E-05 | 0.15       | 0.55     | 0.45     |
| <i>Bacteroides dorei</i>                | 6.7E-03 | 1.6E-02 | 0.48       | 0.75     | 0.47     | 2.8E-03 | 1.0E-02 | 0.41       | 0.91     | 0.49     | 4.2E-03 | 3.3E-03 | 0.42       | 0.20     | 0.37     |
| <i>Eubacterium sp CAG 38</i>            | 2.3E-02 | 1.5E-02 | 0.89       | 0.76     | 0.47     | 3.1E-02 | 1.2E-02 | 0.87       | 0.50     | 0.49     | 1.8E-02 | 1.4E-02 | 0.80       | 0.14     | 0.37     |
| <i>Corynebacterium efficiens</i>        | 1.3E-04 | 1.1E-04 | 0.35       | 0.76     | 0.47     | 1.3E-04 | 1.5E-04 | 0.34       | 0.81     | 0.49     | 1.1E-04 | 9.6E-05 | 0.35       | 0.81     | 0.49     |
| <i>Veillonella sp T11011 6</i>          | 3.4E-04 | 1.8E-04 | 0.23       | 0.77     | 0.47     | 2.7E-04 | 2.9E-04 | 0.23       | 0.69     | 0.49     | 3.0E-04 | 1.7E-04 | 0.22       | 0.66     | 0.48     |
| <i>Rothia dentocariosa</i>              | 2.9E-04 | 2.0E-04 | 0.58       | 0.77     | 0.47     | 2.0E-04 | 1.9E-04 | 0.55       | 0.89     | 0.49     | 2.0E-04 | 1.7E-04 | 0.59       | 0.82     | 0.49     |
| <i>Bacteroides thetaiotaomicron</i>     | 1.8E-02 | 1.8E-02 | 0.97       | 0.77     | 0.47     | 1.3E-02 | 1.7E-02 | 0.98       | 0.84     | 0.49     | 1.4E-02 | 1.5E-02 | 0.98       | 0.54     | 0.45     |
| <i>Agathobaculum butyriciproducens</i>  | 3.6E-03 | 3.4E-03 | 0.94       | 0.77     | 0.47     | 3.9E-03 | 3.3E-03 | 0.95       | 0.27     | 0.40     | 3.6E-03 | 3.9E-03 | 0.91       | 0.93     | 0.50     |
| <i>Ruthenibacterium lactatiformans</i>  | 3.5E-03 | 3.7E-03 | 0.87       | 0.78     | 0.47     | 6.3E-03 | 5.7E-03 | 0.86       | 0.46     | 0.49     | 4.1E-03 | 3.0E-03 | 0.80       | 0.28     | 0.40     |
| <i>Prevotella oris</i>                  | 4.0E-04 | 3.5E-04 | 0.68       | 0.78     | 0.47     | 3.6E-04 | 3.6E-04 | 0.65       | 0.82     | 0.49     | 5.2E-04 | 5.4E-04 | 0.72       | 0.56     | 0.45     |
| <i>Ruminococcus torques</i>             | 8.5E-03 | 6.1E-03 | 0.79       | 0.79     | 0.47     | 9.1E-03 | 5.5E-03 | 0.86       | 0.56     | 0.49     | 1.1E-02 | 7.0E-03 | 0.87       | 0.24     | 0.37     |
| <i>Prevotella sp CAG 755</i>            | 1.7E-04 | 1.5E-04 | 0.27       | 0.79     | 0.47     | 1.6E-04 | 1.1E-04 | 0.26       | 0.47     | 0.49     | 2.5E-04 | 2.2E-04 | 0.37       | 0.56     | 0.45     |
| <i>Prevotella buccalis</i>              | 7.2E-05 | 5.7E-05 | 0.16       | 0.79     | 0.47     | 6.3E-05 | 7.4E-05 | 0.16       | 0.78     | 0.49     | 5.9E-05 | 6.9E-05 | 0.14       | 0.34     | 0.41     |
| <i>Parasutterella excrementihominis</i> | 3.6E-03 | 2.6E-03 | 0.67       | 0.79     | 0.47     | 4.9E-03 | 3.6E-03 | 0.63       | 0.77     | 0.49     | 5.6E-03 | 4.7E-03 | 0.64       | 0.13     | 0.37     |
| <i>Enterobacter cloacae complex</i>     | 7.3E-04 | 8.3E-05 | 0.13       | 0.80     | 0.47     | 3.1E-04 | 1.7E-04 | 0.18       | 0.97     | 0.49     | 9.3E-05 | 1.5E-04 | 0.09       | 0.66     | 0.48     |
| <i>Streptococcus thermophilus</i>       | 1.7E-03 | 1.4E-03 | 0.23       | 0.80     | 0.47     | 1.5E-03 | 9.5E-04 | 0.18       | 0.82     | 0.49     | 5.4E-04 | 1.6E-03 | 0.17       | 0.42     | 0.42     |
| <i>Clostridium citroniae</i>            | 3.1E-04 | 2.9E-04 | 0.43       | 0.80     | 0.47     | 2.1E-04 | 2.7E-04 | 0.38       | 0.55     | 0.49     | 1.6E-04 | 1.8E-04 | 0.30       | 0.08     | 0.34     |
| <i>Bifidobacterium bifidum</i>          | 2.5E-04 | 5.1E-04 | 0.25       | 0.81     | 0.47     | 1.6E-04 | 1.9E-04 | 0.34       | 0.72     | 0.49     | 1.6E-04 | 1.6E-04 | 0.27       | 0.38     | 0.42     |
| <i>Mycobacteroides abscessus</i>        | 1.4E-04 | 1.5E-04 | 0.58       | 0.81     | 0.47     | 1.3E-04 | 1.6E-04 | 0.55       | 0.54     | 0.49     | 1.5E-04 | 1.8E-04 | 0.61       | 0.50     | 0.45     |
| <i>Bifidobacterium breve</i>            | 1.4E-04 | 3.7E-04 | 0.13       | 0.82     | 0.47     | 3.1E-05 | 3.4E-05 | 0.08       | 0.93     | 0.49     | 6.6E-05 | 9.9E-05 | 0.11       | 0.21     | 0.37     |
| <i>Janibacter melonis</i>               | 6.3E-05 | 6.5E-05 | 0.18       | 0.83     | 0.47     | 4.3E-05 | 4.8E-05 | 0.08       | 0.94     | 0.49     | 5.0E-05 | 6.1E-05 | 0.16       | 0.73     | 0.48     |
| <i>Dorea formicigenerans</i>            | 3.2E-03 | 2.9E-03 | 0.92       | 0.83     | 0.47     | 3.6E-03 | 2.7E-03 | 0.94       | 0.37     | 0.46     | 2.6E-03 | 2.3E-03 | 0.92       | 0.27     | 0.39     |
| <i>Megamonas funiformis</i>             | 1.3E-02 | 6.2E-03 | 0.46       | 0.83     | 0.47     | 8.1E-03 | 1.5E-02 | 0.65       | 0.23     | 0.38     | 7.6E-03 | 8.5E-03 | 0.58       | 0.98     | 0.50     |
| <i>Bacteroides coprophilus</i>          | 5.3E-05 | 2.0E-04 | 0.10       | 0.83     | 0.47     | 1.6E-04 | 4.9E-05 | 0.09       | 0.79     | 0.49     | 7.8E-05 | 1.7E-04 | 0.14       | 0.36     | 0.41     |
| <i>Klebsiella variicola</i>             | 1.1E-03 | 7.6E-04 | 0.34       | 0.84     | 0.48     | 1.3E-03 | 1.5E-03 | 0.36       | 0.40     | 0.46     | 9.6E-04 | 9.6E-04 | 0.23       | 0.96     | 0.50     |
| <i>Actinomyces georgiae</i>             | 2.6E-04 | 3.0E-04 | 0.63       | 0.85     | 0.48     | 2.8E-04 | 3.8E-04 | 0.70       | 0.19     | 0.36     | 3.0E-04 | 3.2E-04 | 0.65       | 0.69     | 0.48     |
| <i>Sellimonas intestinalis</i>          | 2.8E-04 | 3.9E-04 | 0.13       | 0.86     | 0.48     | 3.3E-04 | 5.5E-04 | 0.13       | 0.11     | 0.35     | 9.0E-05 | 2.1E-04 | 0.09       | 0.92     | 0.50     |
| <i>Ruminococcus gnavus</i>              | 7.5E-03 | 3.3E-03 | 0.60       | 0.86     | 0.48     | 1.4E-02 | 5.1E-03 | 0.64       | 0.70     | 0.49     | 7.6E-03 | 4.4E-03 | 0.66       | 0.72     | 0.48     |
| <i>Sanguibacteroides justesenii</i>     | 1.0E-04 | 4.7E-05 | 0.17       | 0.87     | 0.48     | 6.0E-05 | 7.5E-05 | 0.18       | 0.77     | 0.49     | 6.9E-05 | 6.0E-05 | 0.22       | 0.81     | 0.49     |

**Table S2. The relative abundance and prevalence of microbial species included in the current analysis.**

| Species                                  | T1      |         |            |          |          | T2      |         |            |          |          | T3      |         |            |          |          |
|------------------------------------------|---------|---------|------------|----------|----------|---------|---------|------------|----------|----------|---------|---------|------------|----------|----------|
|                                          | Mean    | Mean    | Prevalence | Wilcoxon | Wilcoxon | Mean    | Mean    | Prevalence | Wilcoxon | Wilcoxon | Mean    | Mean    | Prevalence | Wilcoxon | Wilcoxon |
|                                          | case    | control |            | P        | FDR      | case    | control |            | P        | FDR      | case    | control |            | P        | FDR      |
| <i>Lawsonibacter asaccharolyticus</i>    | 8.7E-05 | 1.0E-04 | 0.23       | 0.87     | 0.48     | 9.5E-05 | 1.1E-04 | 0.23       | 0.99     | 0.50     | 2.7E-04 | 5.1E-05 | 0.15       | 0.06     | 0.34     |
| <i>Dorea longicatena</i>                 | 5.5E-03 | 5.0E-03 | 0.92       | 0.89     | 0.49     | 7.5E-03 | 5.5E-03 | 0.93       | 0.56     | 0.49     | 5.3E-03 | 8.3E-03 | 0.96       | 0.22     | 0.37     |
| <i>Bifidobacterium pseudocatenulatum</i> | 9.0E-03 | 6.0E-03 | 0.79       | 0.89     | 0.49     | 1.0E-02 | 1.2E-02 | 0.87       | 0.73     | 0.49     | 1.3E-02 | 1.2E-02 | 0.88       | 0.86     | 0.50     |
| <i>Bacteroides vulgatus</i>              | 4.6E-02 | 4.3E-02 | 0.49       | 0.89     | 0.49     | 3.4E-02 | 2.2E-02 | 0.44       | 0.71     | 0.49     | 5.9E-02 | 2.3E-02 | 0.45       | 0.20     | 0.37     |
| <i>Coprobacter fastidiosus</i>           | 8.6E-04 | 1.2E-03 | 0.40       | 0.92     | 0.49     | 6.4E-04 | 1.6E-03 | 0.33       | 0.87     | 0.49     | 6.0E-04 | 2.8E-03 | 0.36       | 0.17     | 0.37     |
| <i>Atopobium deltae</i>                  | 3.1E-04 | 2.8E-04 | 0.28       | 0.92     | 0.49     | 1.6E-04 | 1.2E-04 | 0.20       | 0.12     | 0.35     | 5.8E-04 | 2.9E-04 | 0.23       | 0.15     | 0.37     |
| <i>Eubacterium sp CAG 180</i>            | 3.6E-02 | 3.7E-02 | 0.81       | 0.92     | 0.49     | 2.5E-02 | 2.7E-02 | 0.74       | 0.74     | 0.49     | 2.7E-02 | 3.1E-02 | 0.77       | 0.70     | 0.48     |
| <i>Blautia wexlerae</i>                  | 3.8E-03 | 4.2E-03 | 0.99       | 0.92     | 0.49     | 5.4E-03 | 4.9E-03 | 0.98       | 0.59     | 0.49     | 5.3E-03 | 2.5E-03 | 0.97       | 0.09     | 0.34     |
| <i>Bacteroides nordii</i>                | 2.3E-04 | 9.0E-05 | 0.22       | 0.92     | 0.49     | 3.4E-04 | 7.2E-05 | 0.15       | 0.59     | 0.49     | 8.9E-05 | 1.2E-04 | 0.16       | 0.73     | 0.48     |
| <i>Bacteroides clarus</i>                | 1.8E-03 | 1.1E-03 | 0.34       | 0.92     | 0.49     | 4.3E-04 | 5.9E-04 | 0.25       | 0.89     | 0.49     | 1.4E-03 | 5.2E-04 | 0.32       | 0.35     | 0.41     |
| <i>Corynebacterium kroppenstedtii</i>    | 5.2E-05 | 5.0E-05 | 0.16       | 0.93     | 0.49     | 5.4E-05 | 4.4E-05 | 0.13       | 0.01     | 0.12     | 5.4E-05 | 5.7E-05 | 0.17       | 0.45     | 0.43     |
| <i>Corynebacterium matruchotii</i>       | 4.1E-05 | 7.1E-05 | 0.13       | 0.93     | 0.49     | 1.3E-04 | 3.7E-05 | 0.12       | 0.07     | 0.33     | 5.8E-05 | 4.5E-05 | 0.11       | 0.78     | 0.49     |
| <i>Rhodococcus qingshengii</i>           | 5.4E-05 | 5.5E-05 | 0.12       | 0.93     | 0.49     | 4.4E-05 | 5.1E-05 | 0.08       | 0.59     | 0.49     | 6.6E-05 | 5.7E-05 | 0.14       | 0.42     | 0.42     |
| <i>Bacteroides stercorisoris</i>         | 1.1E-04 | 6.8E-05 | 0.22       | 0.94     | 0.49     | 6.0E-05 | 5.9E-05 | 0.17       | 0.89     | 0.49     | 6.7E-05 | 7.1E-05 | 0.20       | 0.80     | 0.49     |
| <i>Ruminococcus callidus</i>             | 2.0E-04 | 2.1E-04 | 0.18       | 0.94     | 0.49     | 1.5E-04 | 3.0E-04 | 0.18       | 0.39     | 0.46     | 3.0E-04 | 2.3E-04 | 0.21       | 0.97     | 0.50     |
| <i>Klebsiella pneumoniae</i>             | 2.5E-03 | 2.6E-03 | 0.46       | 0.94     | 0.49     | 3.4E-03 | 4.7E-03 | 0.46       | 0.93     | 0.49     | 2.1E-03 | 2.7E-03 | 0.35       | 0.80     | 0.49     |
| <i>Gemmiger formicilis</i>               | 4.3E-03 | 3.8E-03 | 0.80       | 0.95     | 0.49     | 4.9E-03 | 3.4E-03 | 0.84       | 0.68     | 0.49     | 3.2E-03 | 2.4E-03 | 0.85       | 0.69     | 0.48     |
| <i>Erysipelatoclostridium ramosum</i>    | 1.9E-04 | 3.1E-04 | 0.15       | 0.95     | 0.49     | 7.3E-04 | 3.1E-04 | 0.14       | 0.91     | 0.49     | 2.0E-04 | 2.8E-04 | 0.13       | 0.34     | 0.41     |
| <i>Anaerostipes hadrus</i>               | 1.0E-02 | 6.2E-03 | 0.97       | 0.96     | 0.49     | 1.2E-02 | 1.1E-02 | 0.98       | 0.02     | 0.17     | 1.3E-02 | 9.7E-03 | 0.95       | 0.11     | 0.37     |
| <i>Bacteroides sp CAG 144</i>            | 6.1E-05 | 9.3E-05 | 0.17       | 0.96     | 0.49     | 4.8E-05 | 4.5E-05 | 0.13       | 0.29     | 0.41     | 5.0E-05 | 9.6E-05 | 0.19       | 0.53     | 0.45     |
| <i>Delftia acidovorans</i>               | 6.0E-04 | 5.0E-04 | 0.42       | 0.97     | 0.49     | 6.1E-04 | 5.5E-04 | 0.47       | 0.56     | 0.49     | 1.0E-03 | 7.0E-04 | 0.65       | 0.89     | 0.50     |
| <i>Coprococcus comes</i>                 | 5.3E-03 | 5.5E-03 | 0.82       | 0.97     | 0.49     | 7.6E-03 | 7.6E-03 | 0.87       | 0.98     | 0.50     | 8.5E-03 | 5.9E-03 | 0.88       | 0.24     | 0.37     |
| <i>Micrococcus lylae</i>                 | 5.9E-05 | 5.5E-05 | 0.13       | 0.98     | 0.50     | 4.7E-05 | 4.6E-05 | 0.09       | 0.79     | 0.49     | 5.1E-05 | 5.8E-05 | 0.16       | 0.29     | 0.40     |
| <i>Bifidobacterium animalis</i>          | 1.1E-04 | 1.4E-04 | 0.13       | 0.99     | 0.50     | 1.5E-04 | 1.2E-04 | 0.15       | 0.03     | 0.20     | 1.2E-04 | 2.1E-04 | 0.12       | 0.53     | 0.45     |
| <i>Actinomyces graevenitzi</i>           | 2.1E-04 | 1.0E-04 | 0.20       | 0.99     | 0.50     | 1.4E-04 | 3.9E-05 | 0.17       | 0.01     | 0.13     | 7.0E-05 | 5.8E-05 | 0.15       | 0.41     | 0.42     |
| <i>Barnesiella intestinihominis</i>      | 1.8E-03 | 3.8E-03 | 0.43       | 1.00     | 0.50     | 2.7E-03 | 5.8E-03 | 0.43       | 0.29     | 0.41     | 3.4E-03 | 2.6E-03 | 0.41       | 0.90     | 0.50     |
| <i>Prevotella sp CAG 1058</i>            | 1.7E-04 | 9.4E-05 | 0.26       | 1.00     | 0.50     | 9.8E-05 | 1.4E-04 | 0.25       | 0.72     | 0.49     | 9.4E-05 | 2.9E-04 | 0.35       | 0.21     | 0.37     |

Table S3. The microbial pathways included in the current analysis.

| Pathway               | Class                                    | T1      |         |           |          |          | T2      |         |           |          |          | T3      |         |           |          |          |
|-----------------------|------------------------------------------|---------|---------|-----------|----------|----------|---------|---------|-----------|----------|----------|---------|---------|-----------|----------|----------|
|                       |                                          | Mean    | Mean    | Prevalenc | Wilcoxon | Wilcoxon | Mean    | Mean    | Prevalenc | Wilcoxon | Wilcoxon | Mean    | Mean    | Prevalenc | Wilcoxon | Wilcoxon |
|                       |                                          | case    | control | e         | P        | FDR      | case    | control | e         | P        | FDR      | case    | control | e         | P        | FDR      |
| ANAEROFrucAT-PWY      | fermentation                             | 6.0E-03 | 6.5E-03 | 1.00      | 0.00     | 0.17     | 6.1E-03 | 6.3E-03 | 1.00      | 0.36     | 0.61     | 6.0E-03 | 6.1E-03 | 1.00      | 0.71     | 0.46     |
| ANAGLYCOLYSIS-PWY     | glycolysis                               | 8.4E-03 | 9.2E-03 | 1.00      | 0.00     | 0.03     | 8.6E-03 | 8.9E-03 | 1.00      | 0.20     | 0.41     | 8.7E-03 | 8.8E-03 | 1.00      | 0.72     | 0.46     |
| FUC-RHAMCAT-PWY       | sugar derivatives degradation            | 1.2E-03 | 1.2E-03 | 1.00      | 0.89     | 0.49     | 1.2E-03 | 1.1E-03 | 1.00      | 0.09     | 0.33     | 1.2E-03 | 9.8E-04 | 0.99      | 0.00     | 0.16     |
| GALACT-GLUCUROCAT-PWY | sugar derivatives degradation            | 1.6E-03 | 1.5E-03 | 1.00      | 0.90     | 0.49     | 1.7E-03 | 1.4E-03 | 1.00      | 0.00     | 0.09     | 1.5E-03 | 1.4E-03 | 1.00      | 0.18     | 0.30     |
| GALACTUROCAT-PWY      | sugar derivatives degradation            | 1.5E-03 | 1.4E-03 | 1.00      | 0.94     | 0.49     | 1.6E-03 | 1.3E-03 | 1.00      | 0.01     | 0.10     | 1.4E-03 | 1.3E-03 | 1.00      | 0.32     | 0.37     |
| GLUCUROCAT-PWY        | sugar derivatives degradation            | 1.7E-03 | 1.7E-03 | 1.00      | 0.45     | 0.47     | 1.8E-03 | 1.6E-03 | 1.00      | 0.00     | 0.08     | 1.7E-03 | 1.6E-03 | 1.00      | 0.20     | 0.30     |
| HISTSYN-PWY           | amino acids biosynthesis                 | 1.0E-02 | 1.0E-02 | 1.00      | 0.48     | 0.47     | 9.6E-03 | 1.0E-02 | 1.00      | 0.08     | 0.31     | 1.0E-02 | 1.1E-02 | 1.00      | 0.05     | 0.30     |
| MET-SAM-PWY           | amino acids biosynthesis                 | 2.2E-03 | 2.0E-03 | 1.00      | 0.48     | 0.47     | 2.4E-03 | 2.0E-03 | 1.00      | 0.01     | 0.13     | 2.2E-03 | 1.8E-03 | 1.00      | 0.06     | 0.30     |
| P164-PWY              | nucleosides and nucleotides degradation  | 9.9E-04 | 9.6E-04 | 1.00      | 0.68     | 0.49     | 1.1E-03 | 9.4E-04 | 1.00      | 0.00     | 0.08     | 1.1E-03 | 8.7E-04 | 0.97      | 0.00     | 0.16     |
| PWY-1042              | glycolysis                               | 1.5E-02 | 1.5E-02 | 1.00      | 0.39     | 0.44     | 1.4E-02 | 1.5E-02 | 1.00      | 0.01     | 0.13     | 1.5E-02 | 1.5E-02 | 1.00      | 0.45     | 0.39     |
| PWY-5177              | carboxylates degradation                 | 1.6E-03 | 1.5E-03 | 1.00      | 0.34     | 0.44     | 1.9E-03 | 1.5E-03 | 1.00      | 0.01     | 0.09     | 1.6E-03 | 1.4E-03 | 1.00      | 0.18     | 0.30     |
| PWY-6113              | fatty acid and lipid biosynthesis        | 1.1E-03 | 9.1E-04 | 0.82      | 0.19     | 0.40     | 1.2E-03 | 1.0E-03 | 0.88      | 0.04     | 0.21     | 1.1E-03 | 8.9E-04 | 0.78      | 0.11     | 0.30     |
| PWY-6121              | nucleosides and nucleotides biosynthesis | 1.1E-02 | 1.1E-02 | 1.00      | 0.01     | 0.23     | 1.1E-02 | 1.1E-02 | 1.00      | 0.53     | 0.71     | 1.1E-02 | 1.1E-02 | 1.00      | 0.57     | 0.42     |
| PWY-6353              | nucleosides and nucleotides degradation  | 1.7E-03 | 1.7E-03 | 1.00      | 0.91     | 0.49     | 1.9E-03 | 1.6E-03 | 1.00      | 0.01     | 0.09     | 1.8E-03 | 1.5E-03 | 1.00      | 0.10     | 0.30     |
| PWY-6608              | nucleosides and nucleotides degradation  | 2.0E-03 | 1.8E-03 | 1.00      | 0.62     | 0.49     | 2.2E-03 | 1.7E-03 | 1.00      | 0.00     | 0.08     | 2.3E-03 | 1.7E-03 | 1.00      | 0.00     | 0.16     |
| PWY-6609              | nucleosides and nucleotides biosynthesis | 1.4E-02 | 1.4E-02 | 1.00      | 0.60     | 0.49     | 1.3E-02 | 1.4E-02 | 1.00      | 0.01     | 0.10     | 1.4E-02 | 1.4E-02 | 1.00      | 0.16     | 0.30     |
| PWY-6700              | nucleosides and nucleotides biosynthesis | 1.2E-02 | 1.2E-02 | 1.00      | 0.74     | 0.49     | 1.2E-02 | 1.3E-02 | 1.00      | 0.03     | 0.20     | 1.3E-02 | 1.3E-02 | 1.00      | 0.10     | 0.30     |
| PWY-6703              | secondary metabolites biosynthesis       | 7.5E-03 | 7.6E-03 | 1.00      | 0.98     | 0.50     | 7.4E-03 | 7.7E-03 | 1.00      | 0.33     | 0.58     | 7.7E-03 | 8.6E-03 | 1.00      | 0.02     | 0.30     |
| PWY-7211              | nucleosides and nucleotides biosynthesis | 1.6E-03 | 1.7E-03 | 0.99      | 0.59     | 0.49     | 1.7E-03 | 1.4E-03 | 0.99      | 0.01     | 0.09     | 1.7E-03 | 1.5E-03 | 0.99      | 0.07     | 0.30     |
| PWY-7237              | sugar derivatives degradation            | 8.0E-03 | 7.1E-03 | 1.00      | 0.06     | 0.33     | 7.7E-03 | 7.0E-03 | 1.00      | 0.06     | 0.26     | 7.7E-03 | 7.4E-03 | 0.98      | 0.53     | 0.40     |
| PWY-7242              | sugar derivatives degradation            | 1.4E-03 | 1.4E-03 | 1.00      | 0.68     | 0.49     | 1.5E-03 | 1.3E-03 | 1.00      | 0.00     | 0.09     | 1.4E-03 | 1.3E-03 | 1.00      | 0.16     | 0.30     |
| PWY-7456              | polysaccharides degradation              | 2.1E-03 | 2.4E-03 | 0.99      | 0.00     | 0.17     | 2.1E-03 | 2.1E-03 | 1.00      | 0.65     | 0.79     | 2.1E-03 | 2.0E-03 | 1.00      | 0.63     | 0.43     |
| PWY0-1319             | fatty acid and lipid biosynthesis        | 1.1E-02 | 1.1E-02 | 1.00      | 0.01     | 0.23     | 1.1E-02 | 1.1E-02 | 1.00      | 0.27     | 0.50     | 1.1E-02 | 1.1E-02 | 1.00      | 0.53     | 0.40     |
| PWY0-162              | nucleosides and nucleotides biosynthesis | 4.5E-03 | 4.7E-03 | 1.00      | 0.12     | 0.37     | 4.4E-03 | 4.8E-03 | 1.00      | 0.04     | 0.21     | 4.6E-03 | 5.0E-03 | 1.00      | 0.08     | 0.30     |
| SALVADEHYPOX-PWY      | nucleosides and nucleotides degradation  | 1.4E-03 | 1.2E-03 | 1.00      | 0.36     | 0.44     | 1.6E-03 | 1.2E-03 | 1.00      | 0.00     | 0.08     | 1.4E-03 | 1.2E-03 | 0.99      | 0.10     | 0.30     |
| TRNA-CHARGING-PWY     | aminoacyl-trnas charging                 | 1.3E-02 | 1.3E-02 | 1.00      | 0.39     | 0.44     | 1.3E-02 | 1.3E-02 | 1.00      | 0.00     | 0.09     | 1.3E-02 | 1.3E-02 | 1.00      | 0.16     | 0.30     |
| 1CMET2-PWY            | vitamin biosynthesis                     | 1.1E-02 | 1.1E-02 | 1.00      | 0.07     | 0.33     | 1.1E-02 | 1.1E-02 | 1.00      | 0.09     | 0.31     | 1.1E-02 | 1.1E-02 | 1.00      | 0.41     | 0.38     |
| ARG+POLYAMINE-SYN     | amino acids biosynthesis                 | 1.8E-03 | 1.7E-03 | 1.00      | 0.58     | 0.49     | 1.9E-03 | 1.7E-03 | 1.00      | 0.09     | 0.32     | 1.6E-03 | 1.5E-03 | 0.99      | 0.44     | 0.39     |
| ARO-PWY               | amino acids biosynthesis                 | 1.1E-02 | 1.1E-02 | 1.00      | 0.14     | 0.37     | 1.1E-02 | 1.1E-02 | 1.00      | 0.82     | 0.91     | 1.1E-02 | 1.0E-02 | 1.00      | 0.62     | 0.43     |

Table S3. The microbial pathways included in the current analysis.

| Pathway                   | Class                                         | T1      |         |           |          |          | T2      |         |           |          |          | T3      |         |           |          |          |
|---------------------------|-----------------------------------------------|---------|---------|-----------|----------|----------|---------|---------|-----------|----------|----------|---------|---------|-----------|----------|----------|
|                           |                                               | Mean    | Mean    | Prevalenc | Wilcoxon | Wilcoxon | Mean    | Mean    | Prevalenc | Wilcoxon | Wilcoxon | Mean    | Mean    | Prevalenc | Wilcoxon | Wilcoxon |
|                           |                                               | case    | control | e         | P        | FDR      | case    | control | e         | P        | FDR      | case    | control | e         | P        | FDR      |
| ASPASN-PWY                | amino acids biosynthesis                      | 6.6E-03 | 6.3E-03 | 1.00      | 0.93     | 0.49     | 6.1E-03 | 6.5E-03 | 1.00      | 0.25     | 0.47     | 6.9E-03 | 7.2E-03 | 1.00      | 0.42     | 0.38     |
| BIOTIN-BIOSYNTHESIS-PWY   | vitamin biosynthesis                          | 2.5E-03 | 2.4E-03 | 1.00      | 0.57     | 0.49     | 2.3E-03 | 2.2E-03 | 1.00      | 0.54     | 0.71     | 2.4E-03 | 2.3E-03 | 1.00      | 0.88     | 0.49     |
| BRANCHED-CHAIN-AA-SYN-PWY | amino acids biosynthesis                      | 1.2E-02 | 1.2E-02 | 1.00      | 0.59     | 0.49     | 1.1E-02 | 1.2E-02 | 1.00      | 0.02     | 0.19     | 1.2E-02 | 1.2E-02 | 1.00      | 0.47     | 0.39     |
| CALVIN-PWY                | carbohydrates biosynthesis                    | 9.8E-03 | 1.0E-02 | 1.00      | 0.24     | 0.42     | 9.8E-03 | 1.0E-02 | 1.00      | 0.27     | 0.50     | 9.4E-03 | 9.3E-03 | 1.00      | 0.51     | 0.40     |
| COA-PWY                   | cofactor biosynthesis                         | 9.9E-03 | 1.0E-02 | 1.00      | 0.17     | 0.38     | 1.0E-02 | 1.0E-02 | 1.00      | 0.13     | 0.36     | 1.0E-02 | 1.0E-02 | 1.00      | 0.95     | 0.49     |
| COBALSYN-PWY              | vitamin biosynthesis                          | 3.5E-03 | 3.6E-03 | 1.00      | 0.24     | 0.42     | 3.8E-03 | 3.5E-03 | 1.00      | 0.11     | 0.35     | 3.4E-03 | 3.3E-03 | 1.00      | 0.29     | 0.36     |
| COLANSYN-PWY              | carbohydrates biosynthesis                    | 2.5E-03 | 2.7E-03 | 1.00      | 0.04     | 0.33     | 2.6E-03 | 2.4E-03 | 1.00      | 0.19     | 0.41     | 2.5E-03 | 2.3E-03 | 1.00      | 0.13     | 0.30     |
| COMPLETE-ARO-PWY          | amino acids biosynthesis                      | 1.0E-02 | 1.1E-02 | 1.00      | 0.13     | 0.37     | 1.1E-02 | 1.1E-02 | 1.00      | 0.97     | 1.00     | 1.0E-02 | 1.0E-02 | 1.00      | 0.81     | 0.48     |
| DAPLYSINESYN-PWY          | amino acids biosynthesis                      | 1.3E-03 | 1.2E-03 | 1.00      | 0.43     | 0.46     | 1.5E-03 | 1.4E-03 | 0.99      | 0.47     | 0.68     | 1.5E-03 | 1.3E-03 | 0.99      | 0.08     | 0.30     |
| DTDPRHAMSYN-PWY           | carbohydrates biosynthesis                    | 1.7E-02 | 1.6E-02 | 1.00      | 0.44     | 0.46     | 1.5E-02 | 1.6E-02 | 1.00      | 0.33     | 0.58     | 1.6E-02 | 1.7E-02 | 1.00      | 0.15     | 0.30     |
| FASYN-ELONG-PWY           | fatty acid and lipid biosynthesis             | 2.6E-03 | 2.4E-03 | 1.00      | 0.27     | 0.42     | 2.5E-03 | 2.3E-03 | 1.00      | 0.45     | 0.67     | 2.5E-03 | 2.4E-03 | 1.00      | 0.79     | 0.48     |
| FERMENTATION-PWY          | fermentation                                  | 1.1E-03 | 1.0E-03 | 0.98      | 0.72     | 0.49     | 1.2E-03 | 1.1E-03 | 0.99      | 0.14     | 0.37     | 1.1E-03 | 9.3E-04 | 0.97      | 0.29     | 0.36     |
| GLCMANNANAUT-PWY          | amine and polyamine degradation               | 2.1E-03 | 2.1E-03 | 1.00      | 0.87     | 0.49     | 2.2E-03 | 1.9E-03 | 1.00      | 0.04     | 0.23     | 2.0E-03 | 1.8E-03 | 1.00      | 0.04     | 0.30     |
| GLUCONEO-PWY              | carbohydrates biosynthesis                    | 4.1E-03 | 4.3E-03 | 1.00      | 0.10     | 0.37     | 4.1E-03 | 4.3E-03 | 1.00      | 0.13     | 0.36     | 4.1E-03 | 4.1E-03 | 1.00      | 0.88     | 0.49     |
| GLUTORN-PWY               | amino acids biosynthesis                      | 8.1E-03 | 8.4E-03 | 1.00      | 0.44     | 0.46     | 8.5E-03 | 8.2E-03 | 1.00      | 0.41     | 0.65     | 7.7E-03 | 7.5E-03 | 1.00      | 0.72     | 0.46     |
| GLYCOGENSYNTH-PWY         | carbohydrates biosynthesis                    | 5.7E-03 | 6.0E-03 | 1.00      | 0.29     | 0.43     | 6.3E-03 | 5.8E-03 | 1.00      | 0.07     | 0.28     | 5.7E-03 | 5.4E-03 | 1.00      | 0.15     | 0.30     |
| GLYCOLYSIS-E-D            | glycolysis                                    | 2.3E-03 | 2.4E-03 | 1.00      | 0.24     | 0.42     | 2.4E-03 | 2.4E-03 | 1.00      | 0.80     | 0.90     | 2.3E-03 | 2.2E-03 | 1.00      | 0.44     | 0.39     |
| GLYCOLYSIS                | glycolysis                                    | 4.9E-03 | 5.2E-03 | 1.00      | 0.26     | 0.42     | 5.1E-03 | 5.2E-03 | 1.00      | 0.38     | 0.63     | 5.0E-03 | 5.1E-03 | 1.00      | 0.51     | 0.40     |
| HEXITOLDEGSUPER-PWY       | sugar derivatives degradation                 | 2.0E-03 | 1.9E-03 | 1.00      | 0.35     | 0.44     | 2.1E-03 | 2.0E-03 | 1.00      | 0.39     | 0.64     | 2.0E-03 | 1.8E-03 | 1.00      | 0.16     | 0.30     |
| HISDEG-PWY                | amino acids degradation                       | 3.7E-03 | 3.9E-03 | 1.00      | 0.31     | 0.43     | 3.7E-03 | 3.7E-03 | 1.00      | 0.55     | 0.71     | 4.2E-03 | 4.2E-03 | 1.00      | 1.00     | 0.50     |
| HSERMETANA-PWY            | amino acids biosynthesis                      | 5.5E-03 | 5.6E-03 | 1.00      | 0.33     | 0.43     | 5.9E-03 | 5.5E-03 | 1.00      | 0.06     | 0.26     | 5.5E-03 | 5.6E-03 | 1.00      | 0.69     | 0.46     |
| ILEUSYN-PWY               | amino acids biosynthesis                      | 1.5E-02 | 1.5E-02 | 1.00      | 0.80     | 0.49     | 1.4E-02 | 1.5E-02 | 1.00      | 0.12     | 0.36     | 1.5E-02 | 1.5E-02 | 1.00      | 0.38     | 0.38     |
| NAD-BIOSYNTHESIS-II       | NAD metabolism                                | 9.9E-04 | 8.6E-04 | 0.92      | 0.28     | 0.42     | 1.1E-03 | 8.6E-04 | 0.91      | 0.24     | 0.45     | 1.0E-03 | 1.0E-03 | 0.92      | 0.75     | 0.47     |
| NAGLIPASYN-PWY            | cell structures biosynthesis                  | 2.1E-03 | 2.2E-03 | 1.00      | 0.37     | 0.44     | 2.1E-03 | 2.1E-03 | 1.00      | 0.80     | 0.90     | 2.3E-03 | 2.3E-03 | 1.00      | 0.97     | 0.49     |
| NONOXIPENT-PWY            | generation of precursor metabolite and energy | 6.2E-03 | 6.1E-03 | 1.00      | 0.93     | 0.49     | 6.5E-03 | 6.2E-03 | 1.00      | 0.25     | 0.47     | 5.7E-03 | 5.4E-03 | 1.00      | 0.20     | 0.30     |
| OANTIGEN-PWY              | cell structures biosynthesis                  | 5.7E-03 | 5.9E-03 | 1.00      | 0.38     | 0.44     | 6.1E-03 | 6.0E-03 | 1.00      | 0.56     | 0.71     | 5.7E-03 | 5.7E-03 | 1.00      | 0.76     | 0.47     |
| P441-PWY                  | carboxylates degradation                      | 1.6E-03 | 1.4E-03 | 1.00      | 0.27     | 0.42     | 1.7E-03 | 1.4E-03 | 0.99      | 0.06     | 0.27     | 1.4E-03 | 1.2E-03 | 0.99      | 0.32     | 0.37     |



Table S3. The microbial pathways included in the current analysis.

| Pathway            | Class                                         | T1      |         |           |          |          | T2      |         |           |          |          | T3      |         |           |          |          |
|--------------------|-----------------------------------------------|---------|---------|-----------|----------|----------|---------|---------|-----------|----------|----------|---------|---------|-----------|----------|----------|
|                    |                                               | Mean    | Mean    | Prevalenc | Wilcoxon | Wilcoxon | Mean    | Mean    | Prevalenc | Wilcoxon | Wilcoxon | Mean    | Mean    | Prevalenc | Wilcoxon | Wilcoxon |
|                    |                                               | case    | control | e         | P        | FDR      | case    | control | e         | P        | FDR      | case    | control | e         | P        | FDR      |
| PANTO-PWY          | vitamin biosynthesis                          | 9.4E-03 | 9.4E-03 | 1.00      | 0.63     | 0.49     | 9.1E-03 | 9.6E-03 | 1.00      | 0.04     | 0.21     | 9.5E-03 | 9.7E-03 | 1.00      | 0.35     | 0.38     |
| PANTOSYN-PWY       | cofactor biosynthesis                         | 9.4E-03 | 9.5E-03 | 1.00      | 0.57     | 0.49     | 9.2E-03 | 9.7E-03 | 1.00      | 0.02     | 0.17     | 9.6E-03 | 9.7E-03 | 1.00      | 0.62     | 0.43     |
| PENTOSE-P-PWY      | generation of precursor metabolite and energy | 3.3E-03 | 3.3E-03 | 1.00      | 0.75     | 0.49     | 3.3E-03 | 3.2E-03 | 1.00      | 0.98     | 1.00     | 3.2E-03 | 3.2E-03 | 1.00      | 0.71     | 0.46     |
| PHOSLIPSYN-PWY     | fatty acid and lipid biosynthesis             | 5.0E-03 | 5.0E-03 | 1.00      | 0.89     | 0.49     | 4.8E-03 | 4.9E-03 | 1.00      | 0.86     | 0.92     | 4.9E-03 | 4.8E-03 | 1.00      | 0.44     | 0.39     |
| POLYISOPRENSYN-PWY | polyprenyl biosynthesis                       | 1.5E-03 | 1.5E-03 | 1.00      | 0.72     | 0.49     | 1.5E-03 | 1.4E-03 | 1.00      | 0.47     | 0.68     | 1.6E-03 | 1.5E-03 | 1.00      | 0.82     | 0.48     |
| PRPP-PWY           | amino acids biosynthesis                      | 2.5E-03 | 2.5E-03 | 1.00      | 0.75     | 0.49     | 2.7E-03 | 2.4E-03 | 1.00      | 0.04     | 0.21     | 2.5E-03 | 2.4E-03 | 1.00      | 0.32     | 0.37     |
| PWY-1269           | carbohydrates biosynthesis                    | 3.8E-03 | 3.5E-03 | 1.00      | 0.69     | 0.49     | 3.3E-03 | 3.5E-03 | 1.00      | 0.50     | 0.70     | 3.9E-03 | 3.9E-03 | 1.00      | 0.97     | 0.49     |
| PWY-2941           | amino acids biosynthesis                      | 2.7E-03 | 2.8E-03 | 1.00      | 0.56     | 0.49     | 2.9E-03 | 2.7E-03 | 1.00      | 0.38     | 0.63     | 2.9E-03 | 2.9E-03 | 1.00      | 0.92     | 0.49     |
| PWY-2942           | amino acids biosynthesis                      | 1.1E-02 | 1.1E-02 | 1.00      | 0.65     | 0.49     | 1.1E-02 | 1.1E-02 | 1.00      | 0.07     | 0.28     | 1.1E-02 | 1.2E-02 | 1.00      | 0.10     | 0.30     |
| PWY-3001           | amino acids biosynthesis                      | 8.7E-03 | 8.9E-03 | 1.00      | 0.22     | 0.42     | 8.5E-03 | 8.8E-03 | 1.00      | 0.13     | 0.36     | 8.7E-03 | 8.9E-03 | 1.00      | 0.18     | 0.30     |
| PWY-4981           | amino acids biosynthesis                      | 2.1E-03 | 2.0E-03 | 1.00      | 0.77     | 0.49     | 2.1E-03 | 2.1E-03 | 1.00      | 0.97     | 1.00     | 2.3E-03 | 2.2E-03 | 1.00      | 0.93     | 0.49     |
| PWY-4984           | inorganic nutrients metabolism                | 2.1E-03 | 2.3E-03 | 0.99      | 0.33     | 0.43     | 2.1E-03 | 2.2E-03 | 1.00      | 0.69     | 0.81     | 2.3E-03 | 2.4E-03 | 1.00      | 0.50     | 0.40     |
| PWY-5005           | vitamin biosynthesis                          | 1.1E-03 | 1.0E-03 | 0.92      | 0.63     | 0.49     | 1.1E-03 | 1.1E-03 | 0.92      | 0.41     | 0.65     | 9.6E-04 | 1.1E-03 | 0.92      | 0.49     | 0.40     |
| PWY-5100           | fermentation                                  | 4.6E-03 | 5.0E-03 | 1.00      | 0.10     | 0.37     | 4.9E-03 | 4.9E-03 | 1.00      | 0.62     | 0.77     | 4.4E-03 | 4.4E-03 | 1.00      | 0.93     | 0.49     |
| PWY-5104           | amino acids biosynthesis                      | 2.1E-03 | 2.2E-03 | 1.00      | 1.00     | 0.50     | 2.3E-03 | 2.3E-03 | 1.00      | 0.30     | 0.53     | 2.1E-03 | 1.9E-03 | 1.00      | 0.04     | 0.30     |
| PWY-5154           | amino acids biosynthesis                      | 6.5E-03 | 6.4E-03 | 1.00      | 0.97     | 0.50     | 5.9E-03 | 6.1E-03 | 1.00      | 0.49     | 0.69     | 6.0E-03 | 6.3E-03 | 1.00      | 0.25     | 0.35     |
| PWY-5188           | cofactor biosynthesis                         | 2.9E-03 | 2.9E-03 | 1.00      | 0.95     | 0.49     | 3.2E-03 | 3.2E-03 | 1.00      | 0.78     | 0.89     | 2.8E-03 | 3.0E-03 | 1.00      | 0.42     | 0.38     |
| PWY-5345           | amino acids biosynthesis                      | 1.4E-03 | 1.3E-03 | 0.97      | 0.31     | 0.43     | 1.5E-03 | 1.3E-03 | 0.97      | 0.22     | 0.44     | 1.3E-03 | 1.1E-03 | 0.92      | 0.50     | 0.40     |
| PWY-5484           | glycolysis                                    | 4.5E-03 | 4.8E-03 | 1.00      | 0.16     | 0.37     | 4.6E-03 | 4.7E-03 | 1.00      | 0.46     | 0.68     | 4.6E-03 | 4.7E-03 | 1.00      | 0.55     | 0.40     |
| PWY-5505           | amino acids biosynthesis                      | 1.4E-03 | 1.4E-03 | 1.00      | 0.81     | 0.49     | 1.4E-03 | 1.3E-03 | 1.00      | 0.14     | 0.37     | 1.3E-03 | 1.3E-03 | 1.00      | 0.94     | 0.49     |
| PWY-5659           | carbohydrates biosynthesis                    | 3.1E-03 | 3.2E-03 | 1.00      | 0.23     | 0.42     | 3.2E-03 | 3.0E-03 | 1.00      | 0.13     | 0.36     | 3.2E-03 | 3.0E-03 | 1.00      | 0.38     | 0.38     |
| PWY-5686           | nucleosides and nucleotides biosynthesis      | 1.5E-02 | 1.5E-02 | 1.00      | 0.77     | 0.49     | 1.4E-02 | 1.5E-02 | 1.00      | 0.15     | 0.37     | 1.5E-02 | 1.5E-02 | 1.00      | 0.27     | 0.36     |
| PWY-5695           | polyamine biosynthesis                        | 1.2E-02 | 1.2E-02 | 1.00      | 0.86     | 0.49     | 1.1E-02 | 1.2E-02 | 1.00      | 0.15     | 0.37     | 1.2E-02 | 1.3E-02 | 1.00      | 0.08     | 0.30     |
| PWY-5838           | quinone biosynthesis                          | 1.1E-03 | 9.7E-04 | 0.97      | 0.15     | 0.37     | 1.1E-03 | 9.5E-04 | 0.96      | 0.36     | 0.61     | 9.5E-04 | 9.4E-04 | 0.92      | 0.74     | 0.47     |
| PWY-5941           | polysaccharides degradation                   | 1.3E-03 | 1.4E-03 | 0.97      | 0.11     | 0.37     | 1.1E-03 | 1.1E-03 | 0.93      | 0.96     | 1.00     | 1.3E-03 | 1.2E-03 | 0.97      | 0.88     | 0.49     |
| PWY-5971           | fatty acid and lipid biosynthesis             | 1.9E-03 | 1.6E-03 | 0.82      | 0.10     | 0.37     | 2.0E-03 | 1.7E-03 | 0.89      | 0.05     | 0.26     | 1.8E-03 | 1.5E-03 | 0.79      | 0.20     | 0.30     |
| PWY-5973           | fatty acid and lipid biosynthesis             | 8.2E-03 | 8.6E-03 | 1.00      | 0.23     | 0.42     | 7.9E-03 | 8.4E-03 | 1.00      | 0.16     | 0.38     | 8.5E-03 | 9.0E-03 | 1.00      | 0.11     | 0.30     |
| PWY-6122           | nucleosides and nucleotides biosynthesis      | 1.2E-02 | 1.2E-02 | 1.00      | 0.84     | 0.49     | 1.2E-02 | 1.2E-02 | 1.00      | 0.23     | 0.45     | 1.2E-02 | 1.3E-02 | 1.00      | 0.32     | 0.37     |

Table S3. The microbial pathways included in the current analysis.

| Pathway  | Class                                    | T1      |         |           |          |          | T2      |         |           |          |          | T3      |         |           |          |          |
|----------|------------------------------------------|---------|---------|-----------|----------|----------|---------|---------|-----------|----------|----------|---------|---------|-----------|----------|----------|
|          |                                          | Mean    | Mean    | Prevalenc | Wilcoxon | Wilcoxon | Mean    | Mean    | Prevalenc | Wilcoxon | Wilcoxon | Mean    | Mean    | Prevalenc | Wilcoxon | Wilcoxon |
|          |                                          | case    | control | e         | P        | FDR      | case    | control | e         | P        | FDR      | case    | control | e         | P        | FDR      |
| PWY-6123 | nucleosides and nucleotides biosynthesis | 7.6E-03 | 8.2E-03 | 1.00      | 0.08     | 0.33     | 7.8E-03 | 8.1E-03 | 1.00      | 0.45     | 0.67     | 8.1E-03 | 8.3E-03 | 1.00      | 0.60     | 0.43     |
| PWY-6126 | nucleosides and nucleotides biosynthesis | 8.4E-03 | 8.7E-03 | 1.00      | 0.01     | 0.23     | 8.7E-03 | 8.5E-03 | 1.00      | 0.40     | 0.64     | 8.7E-03 | 8.6E-03 | 1.00      | 0.52     | 0.40     |
| PWY-6147 | vitamin biosynthesis                     | 6.5E-03 | 6.2E-03 | 1.00      | 0.61     | 0.49     | 5.7E-03 | 6.3E-03 | 1.00      | 0.19     | 0.41     | 6.6E-03 | 7.0E-03 | 1.00      | 0.40     | 0.38     |
| PWY-6151 | amino acids biosynthesis                 | 1.1E-02 | 1.1E-02 | 1.00      | 0.76     | 0.49     | 1.1E-02 | 1.1E-02 | 1.00      | 0.57     | 0.71     | 1.1E-02 | 1.2E-02 | 1.00      | 0.33     | 0.37     |
| PWY-6163 | aromatic compounds biosynthesis          | 1.2E-02 | 1.2E-02 | 1.00      | 0.21     | 0.42     | 1.2E-02 | 1.2E-02 | 1.00      | 0.54     | 0.71     | 1.2E-02 | 1.2E-02 | 1.00      | 0.87     | 0.49     |
| PWY-621  | aromatic compounds degradation           | 2.1E-03 | 2.2E-03 | 1.00      | 0.39     | 0.44     | 2.2E-03 | 2.2E-03 | 1.00      | 0.78     | 0.89     | 2.2E-03 | 2.0E-03 | 1.00      | 0.20     | 0.30     |
| PWY-6317 | carbohydrates degradation                | 5.8E-03 | 6.1E-03 | 1.00      | 0.21     | 0.42     | 6.0E-03 | 5.6E-03 | 1.00      | 0.18     | 0.41     | 5.4E-03 | 5.0E-03 | 1.00      | 0.18     | 0.30     |
| PWY-6387 | cell structures biosynthesis             | 1.4E-02 | 1.4E-02 | 1.00      | 0.82     | 0.49     | 1.3E-02 | 1.4E-02 | 1.00      | 0.02     | 0.15     | 1.4E-02 | 1.4E-02 | 1.00      | 0.22     | 0.32     |
| PWY-6470 | cell structures biosynthesis             | 1.4E-03 | 1.4E-03 | 0.98      | 0.57     | 0.49     | 1.5E-03 | 1.4E-03 | 0.98      | 0.59     | 0.73     | 1.5E-03 | 1.2E-03 | 0.97      | 0.13     | 0.30     |
| PWY-6471 | cell structures biosynthesis             | 2.1E-03 | 2.3E-03 | 0.99      | 0.54     | 0.49     | 2.4E-03 | 2.3E-03 | 0.98      | 0.49     | 0.69     | 2.3E-03 | 2.0E-03 | 0.97      | 0.09     | 0.30     |
| PWY-6507 | sugar derivatives degradation            | 1.4E-03 | 1.4E-03 | 1.00      | 0.84     | 0.49     | 1.5E-03 | 1.3E-03 | 1.00      | 0.10     | 0.33     | 1.3E-03 | 1.4E-03 | 1.00      | 0.49     | 0.40     |
| PWY-6545 | nucleosides and nucleotides biosynthesis | 3.2E-03 | 3.2E-03 | 1.00      | 0.90     | 0.49     | 3.3E-03 | 3.3E-03 | 1.00      | 0.99     | 1.00     | 3.0E-03 | 3.2E-03 | 1.00      | 0.09     | 0.30     |
| PWY-6737 | polysaccharides degradation              | 1.4E-02 | 1.4E-02 | 1.00      | 0.01     | 0.23     | 1.4E-02 | 1.4E-02 | 1.00      | 0.90     | 0.95     | 1.3E-02 | 1.3E-02 | 1.00      | 0.38     | 0.38     |
| PWY-6892 | vitamin biosynthesis                     | 4.6E-03 | 5.0E-03 | 1.00      | 0.08     | 0.33     | 4.6E-03 | 4.7E-03 | 1.00      | 0.50     | 0.70     | 4.8E-03 | 4.6E-03 | 1.00      | 0.39     | 0.38     |
| PWY-6895 | vitamin biosynthesis                     | 2.0E-03 | 2.0E-03 | 0.99      | 0.90     | 0.49     | 2.0E-03 | 1.8E-03 | 0.99      | 0.09     | 0.31     | 1.8E-03 | 1.6E-03 | 0.95      | 0.17     | 0.30     |
| PWY-6897 | vitamin biosynthesis                     | 7.1E-03 | 7.0E-03 | 1.00      | 0.77     | 0.49     | 6.6E-03 | 7.0E-03 | 1.00      | 0.17     | 0.39     | 7.3E-03 | 7.4E-03 | 1.00      | 0.23     | 0.33     |
| PWY-6901 | carbohydrates degradation                | 2.9E-03 | 3.1E-03 | 1.00      | 0.13     | 0.37     | 3.0E-03 | 3.0E-03 | 1.00      | 0.75     | 0.87     | 2.9E-03 | 2.9E-03 | 1.00      | 0.72     | 0.46     |
| PWY-7184 | nucleosides and nucleotides biosynthesis | 4.2E-03 | 4.1E-03 | 1.00      | 0.99     | 0.50     | 4.2E-03 | 4.1E-03 | 1.00      | 0.56     | 0.71     | 4.1E-03 | 4.1E-03 | 1.00      | 0.84     | 0.49     |
| PWY-7196 | nucleosides and nucleotides biosynthesis | 1.2E-03 | 1.2E-03 | 0.99      | 0.69     | 0.49     | 1.3E-03 | 1.1E-03 | 0.97      | 0.04     | 0.21     | 1.2E-03 | 1.1E-03 | 0.95      | 0.13     | 0.30     |
| PWY-7197 | nucleosides and nucleotides biosynthesis | 2.8E-03 | 2.8E-03 | 1.00      | 0.95     | 0.49     | 2.9E-03 | 2.8E-03 | 1.00      | 0.69     | 0.81     | 2.7E-03 | 2.8E-03 | 1.00      | 0.73     | 0.46     |
| PWY-7198 | nucleosides and nucleotides biosynthesis | 1.1E-03 | 1.1E-03 | 0.99      | 0.49     | 0.48     | 1.1E-03 | 1.1E-03 | 0.96      | 0.85     | 0.92     | 1.0E-03 | 1.2E-03 | 0.98      | 0.58     | 0.42     |
| PWY-7199 | nucleosides and nucleotides biosynthesis | 9.0E-03 | 9.0E-03 | 1.00      | 0.95     | 0.49     | 8.6E-03 | 9.1E-03 | 1.00      | 0.05     | 0.24     | 9.2E-03 | 9.4E-03 | 1.00      | 0.37     | 0.38     |
| PWY-7208 | nucleosides and nucleotides biosynthesis | 4.9E-03 | 4.7E-03 | 1.00      | 0.42     | 0.46     | 4.9E-03 | 4.6E-03 | 1.00      | 0.20     | 0.41     | 4.7E-03 | 4.9E-03 | 1.00      | 0.46     | 0.39     |
| PWY-7219 | nucleosides and nucleotides biosynthesis | 1.5E-02 | 1.5E-02 | 1.00      | 0.95     | 0.49     | 1.4E-02 | 1.5E-02 | 1.00      | 0.03     | 0.21     | 1.5E-02 | 1.5E-02 | 1.00      | 0.19     | 0.30     |
| PWY-7220 | nucleosides and nucleotides biosynthesis | 6.6E-03 | 6.7E-03 | 1.00      | 0.81     | 0.49     | 7.2E-03 | 6.7E-03 | 1.00      | 0.14     | 0.37     | 7.0E-03 | 6.8E-03 | 1.00      | 0.34     | 0.37     |
| PWY-7221 | nucleosides and nucleotides biosynthesis | 1.4E-02 | 1.4E-02 | 1.00      | 0.44     | 0.46     | 1.3E-02 | 1.4E-02 | 1.00      | 0.02     | 0.14     | 1.4E-02 | 1.4E-02 | 1.00      | 0.16     | 0.30     |
| PWY-7228 | nucleosides and nucleotides biosynthesis | 6.3E-03 | 6.1E-03 | 1.00      | 0.56     | 0.49     | 6.4E-03 | 6.0E-03 | 1.00      | 0.19     | 0.41     | 6.6E-03 | 6.7E-03 | 1.00      | 0.76     | 0.47     |
| PWY-7229 | nucleosides and nucleotides biosynthesis | 9.3E-03 | 9.6E-03 | 1.00      | 0.01     | 0.23     | 9.5E-03 | 9.4E-03 | 1.00      | 0.86     | 0.92     | 9.6E-03 | 9.6E-03 | 1.00      | 0.92     | 0.49     |
| PWY-7234 | nucleosides and nucleotides biosynthesis | 2.3E-03 | 2.4E-03 | 1.00      | 0.28     | 0.42     | 2.4E-03 | 2.7E-03 | 1.00      | 0.15     | 0.37     | 2.5E-03 | 2.6E-03 | 1.00      | 0.73     | 0.46     |

Table S3. The microbial pathways included in the current analysis.

| Pathway          | Class                                    | T1      |         |           |          |          | T2      |         |           |          |          | T3      |         |           |          |          |
|------------------|------------------------------------------|---------|---------|-----------|----------|----------|---------|---------|-----------|----------|----------|---------|---------|-----------|----------|----------|
|                  |                                          | Mean    | Mean    | Prevalenc | Wilcoxon | Wilcoxon | Mean    | Mean    | Prevalenc | Wilcoxon | Wilcoxon | Mean    | Mean    | Prevalenc | Wilcoxon | Wilcoxon |
|                  |                                          | case    | control | e         | P        | FDR      | case    | control | e         | P        | FDR      | case    | control | e         | P        | FDR      |
| PWY-7323         | carbohydrates biosynthesis               | 2.4E-03 | 2.6E-03 | 1.00      | 0.08     | 0.33     | 2.4E-03 | 2.3E-03 | 1.00      | 0.23     | 0.45     | 2.4E-03 | 2.3E-03 | 1.00      | 0.79     | 0.48     |
| PWY-7400         | amino acids biosynthesis                 | 9.3E-03 | 9.7E-03 | 1.00      | 0.28     | 0.42     | 9.7E-03 | 9.5E-03 | 1.00      | 0.56     | 0.71     | 8.8E-03 | 8.7E-03 | 1.00      | 0.83     | 0.49     |
| PWY-7663         | fatty acid and lipid biosynthesis        | 7.6E-03 | 7.8E-03 | 1.00      | 0.30     | 0.43     | 7.3E-03 | 7.7E-03 | 1.00      | 0.20     | 0.41     | 7.8E-03 | 8.2E-03 | 1.00      | 0.16     | 0.30     |
| PWY-841          | nucleosides and nucleotides biosynthesis | 6.9E-03 | 7.0E-03 | 1.00      | 0.72     | 0.49     | 6.9E-03 | 6.8E-03 | 1.00      | 0.45     | 0.67     | 6.9E-03 | 7.2E-03 | 1.00      | 0.33     | 0.37     |
| PWY0-1061        | amino acids biosynthesis                 | 1.5E-03 | 1.6E-03 | 0.95      | 0.83     | 0.49     | 1.4E-03 | 1.5E-03 | 0.92      | 0.99     | 1.00     | 1.3E-03 | 1.1E-03 | 0.92      | 0.90     | 0.49     |
| PWY0-1261        | sugar derivatives degradation            | 3.4E-03 | 3.4E-03 | 1.00      | 0.85     | 0.49     | 3.5E-03 | 3.4E-03 | 1.00      | 0.74     | 0.86     | 3.6E-03 | 3.4E-03 | 1.00      | 0.41     | 0.38     |
| PWY0-1296        | nucleosides and nucleotides degradation  | 7.4E-03 | 7.8E-03 | 1.00      | 0.16     | 0.37     | 7.7E-03 | 7.5E-03 | 1.00      | 0.42     | 0.65     | 7.1E-03 | 6.7E-03 | 1.00      | 0.19     | 0.30     |
| PWY0-1297        | nucleosides and nucleotides degradation  | 9.6E-04 | 8.4E-04 | 0.99      | 0.79     | 0.49     | 1.2E-03 | 9.4E-04 | 0.98      | 0.06     | 0.26     | 9.9E-04 | 8.9E-04 | 0.95      | 0.27     | 0.36     |
| PWY0-1479        | nucleosides and nucleotides biosynthesis | 1.5E-03 | 1.5E-03 | 1.00      | 0.99     | 0.50     | 1.5E-03 | 1.4E-03 | 1.00      | 0.51     | 0.70     | 1.3E-03 | 1.4E-03 | 1.00      | 0.32     | 0.37     |
| PWY0-1586        | cell structures biosynthesis             | 1.0E-02 | 9.8E-03 | 1.00      | 0.47     | 0.47     | 1.0E-02 | 1.0E-02 | 1.00      | 0.83     | 0.92     | 1.0E-02 | 1.1E-02 | 1.00      | 0.92     | 0.49     |
| PWY0-166         | nucleosides and nucleotides biosynthesis | 4.9E-03 | 4.9E-03 | 1.00      | 0.84     | 0.49     | 5.0E-03 | 5.0E-03 | 1.00      | 0.89     | 0.94     | 4.9E-03 | 4.9E-03 | 1.00      | 0.97     | 0.49     |
| PWY0-781         | amino acids biosynthesis                 | 1.1E-03 | 1.0E-03 | 0.99      | 0.32     | 0.43     | 1.3E-03 | 1.1E-03 | 0.98      | 0.13     | 0.36     | 1.2E-03 | 1.0E-03 | 0.97      | 0.08     | 0.30     |
| PWY0-845         | vitamin biosynthesis                     | 2.9E-03 | 3.2E-03 | 1.00      | 0.16     | 0.37     | 2.9E-03 | 3.1E-03 | 1.00      | 0.43     | 0.67     | 3.3E-03 | 3.1E-03 | 1.00      | 0.95     | 0.49     |
| PWY4FS-7         | fatty acid and lipid biosynthesis        | 3.8E-03 | 3.7E-03 | 1.00      | 0.86     | 0.49     | 3.7E-03 | 3.6E-03 | 1.00      | 0.63     | 0.77     | 3.7E-03 | 3.5E-03 | 1.00      | 0.38     | 0.38     |
| PYRIDNUCSAL-PWY  | NAD metabolism                           | 1.1E-03 | 1.0E-03 | 0.96      | 0.80     | 0.49     | 1.3E-03 | 1.1E-03 | 0.96      | 0.11     | 0.35     | 1.2E-03 | 1.0E-03 | 0.92      | 0.39     | 0.38     |
| PYRIDNUCSYN-PWY  | NAD metabolism                           | 8.0E-03 | 8.0E-03 | 1.00      | 0.91     | 0.49     | 7.7E-03 | 8.1E-03 | 1.00      | 0.11     | 0.35     | 8.2E-03 | 8.5E-03 | 1.00      | 0.14     | 0.30     |
| RHAMCAT-PWY      | carbohydrates degradation                | 4.1E-03 | 3.9E-03 | 1.00      | 0.75     | 0.49     | 3.6E-03 | 3.8E-03 | 1.00      | 0.18     | 0.40     | 4.0E-03 | 4.0E-03 | 1.00      | 0.94     | 0.49     |
| RIBOSYN2-PWY     | vitamin biosynthesis                     | 1.0E-02 | 1.0E-02 | 1.00      | 0.93     | 0.49     | 9.8E-03 | 1.0E-02 | 1.00      | 0.08     | 0.31     | 1.0E-02 | 1.1E-02 | 1.00      | 0.09     | 0.30     |
| SER-GLYSYN-PWY   | amino acids biosynthesis                 | 6.4E-03 | 6.7E-03 | 1.00      | 0.16     | 0.37     | 6.6E-03 | 6.7E-03 | 1.00      | 0.45     | 0.67     | 6.6E-03 | 6.8E-03 | 1.00      | 0.29     | 0.36     |
| TCA              | glycolysis                               | 1.5E-03 | 1.5E-03 | 1.00      | 0.66     | 0.49     | 1.7E-03 | 1.6E-03 | 1.00      | 0.16     | 0.37     | 1.5E-03 | 1.3E-03 | 1.00      | 0.47     | 0.39     |
| TEICHOICACID-PWY | cell structures biosynthesis             | 1.1E-03 | 1.2E-03 | 1.00      | 0.14     | 0.37     | 1.2E-03 | 1.2E-03 | 1.00      | 1.00     | 1.00     | 1.2E-03 | 1.2E-03 | 1.00      | 0.97     | 0.49     |
| THISYN-PWY       | vitamin biosynthesis                     | 6.4E-03 | 6.7E-03 | 1.00      | 0.11     | 0.37     | 6.1E-03 | 6.4E-03 | 1.00      | 0.12     | 0.36     | 6.5E-03 | 6.8E-03 | 1.00      | 0.18     | 0.30     |
| THRESYN-PWY      | amino acids biosynthesis                 | 7.7E-03 | 7.9E-03 | 1.00      | 0.55     | 0.49     | 7.6E-03 | 7.7E-03 | 1.00      | 0.54     | 0.71     | 7.8E-03 | 8.0E-03 | 1.00      | 0.28     | 0.36     |
| TRPSYN-PWY       | amino acids biosynthesis                 | 6.4E-03 | 6.6E-03 | 1.00      | 0.11     | 0.37     | 6.6E-03 | 6.5E-03 | 1.00      | 0.86     | 0.92     | 6.3E-03 | 6.5E-03 | 1.00      | 0.54     | 0.40     |
| UDPNAGSYN-PWY    | cell structures biosynthesis             | 4.1E-03 | 4.1E-03 | 1.00      | 0.66     | 0.49     | 4.6E-03 | 4.5E-03 | 1.00      | 0.69     | 0.81     | 4.2E-03 | 4.2E-03 | 1.00      | 0.62     | 0.43     |

**Table S4. Baseline characteristics of the included and excluded GDM cases.**

|                                           | <b>Included<br/>n=120</b> | <b>Excluded<br/>n=298</b> | <b>P-value</b> |
|-------------------------------------------|---------------------------|---------------------------|----------------|
| <b>Age, years</b>                         | 27.5 ( $\pm$ 4.0)         | 28.2 ( $\pm$ 4.2)         | 0.12           |
| <b>Smoking history</b>                    |                           |                           | 0.64           |
| Current/Former                            | 5 (4.2)                   | 18 (6.0)                  |                |
| Never                                     | 115 (95.8)                | 280 (94.0)                |                |
| <b>Drinking history</b>                   |                           |                           | 0.95           |
| Current/Former                            | 23 (19.1)                 | 59 (19.8)                 |                |
| Never                                     | 97 (80.8)                 | 239 (80.2)                |                |
| <b>Education</b>                          |                           |                           | 0.88           |
| Junior secondary                          | 40 (33.3)                 | 93 (31.2)                 |                |
| Senior secondary                          | 62 (51.7)                 | 157 (52.7)                |                |
| Tertiary                                  | 18 (15.0)                 | 48 (16.1)                 |                |
| <b>Family history of type 2 diabetes</b>  | 6 (5.0)                   | 31 (10.4)                 | 0.088          |
| <b>Parity</b>                             |                           |                           | 0.42           |
| 0                                         | 71 (59.2)                 | 155 (52.0)                |                |
| >1                                        | 49 (40.8)                 | 143 (48.0)                |                |
| <b>Prepregnancy BMI, kg/m<sup>2</sup></b> | 21.6 ( $\pm$ 3.1)         | 22.2 ( $\pm$ 3.3)         | 0.062          |
| <b>Baseline BMI, kg/m<sup>2</sup></b>     | 22.0 ( $\pm$ 3.0)         | 22.6 ( $\pm$ 3.3)         | 0.083          |
| <b>Gestational weight gain, kg</b>        | 1.2 ( $\pm$ 2.8)          | 1.1 ( $\pm$ 3.3)          | 0.76           |
| <b>Systolic blood pressure, mmHg</b>      | 111.6 ( $\pm$ 10.2)       | 111.5 ( $\pm$ 10.1)       | 0.96           |
| <b>Diastolic blood pressure, mmHg</b>     | 74.5 ( $\pm$ 8.5)         | 74.3 ( $\pm$ 8.7)         | 0.8            |
| <b>Physical activity levels, METs</b>     | 116.1 ( $\pm$ 65.0)       | 129.7 ( $\pm$ 77.8)       | 0.17           |
| <b>Fasting plasma glucose, mmol/L</b>     | 4.5 ( $\pm$ 0.5)          | 4.5 ( $\pm$ 0.5)          | 0.35           |
| <b>Hemoglobin A1c, %</b>                  | 5.2 ( $\pm$ 0.3)          | 5.2 ( $\pm$ 0.3)          | 0.69           |

Data were shown as Mean  $\pm$  SD for continuous variables or N (%) for categorical variables. The group comparisons were conducted using Student's t-test or Wilcoxon ranked sum test for continuous variables and  $\chi^2$  test or Fisher's exact test for categorical variables.
